# Supplementary material
Source: Royal Society of Chemistry journal article supplement (doi:10.1039/d6dt00529b)
Supplement: d6dt00529b4.pdf [file d6dt00529b4.pdf]

**Structural Evolution during Reversible Halogen Intercalation in  $\text{WTe}_2$ :  
Commensurate–Incommensurate  $\text{WTe}_2\text{I}$  and Multistage  $\text{WTe}_2\text{Br}_x$  ( $x =$   
**0.5, 1.0 and 1.25**)**

Patrick Schmidt,<sup>a</sup> Carl P. Romao,<sup>b</sup> Hans-Jürgen Meyer<sup>\*a</sup>

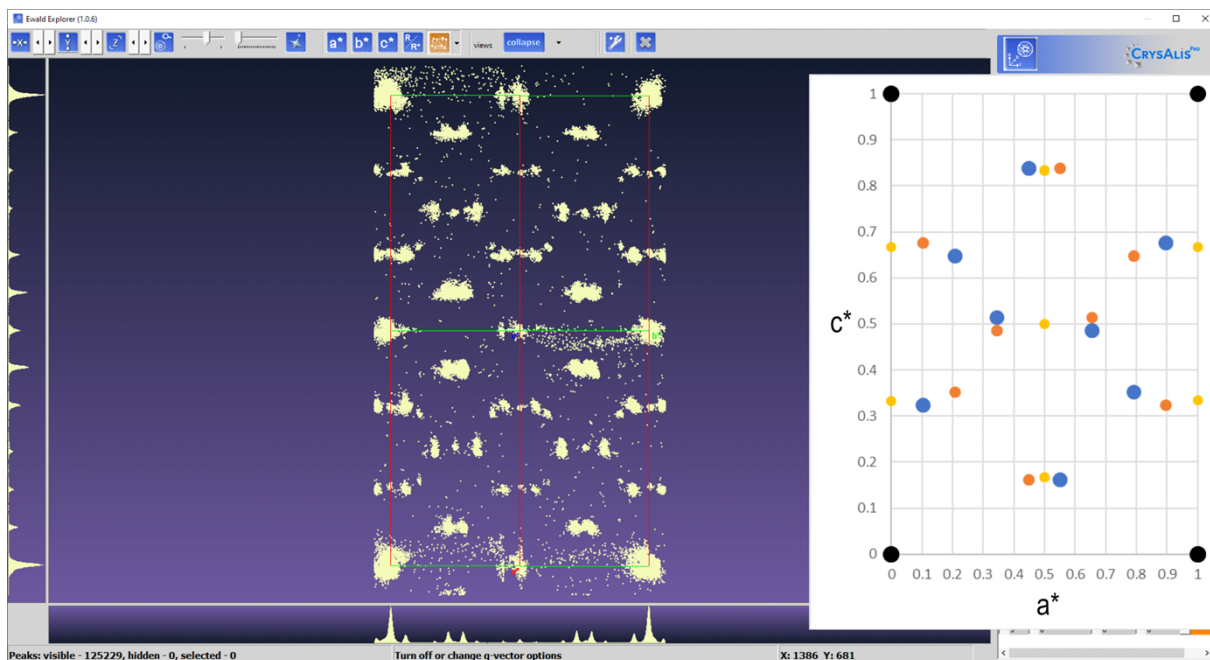

Figure S1. Screenshot from the Ewald Explorer in CrystallisPro showing the collapsed reciprocal lattice, with a simulated satellite pattern on the right (with  $m \leq \pm 4$ ). Black dots mark the main reflections, while red and blue dots indicate incommensurate, twinned satellite reflections. Yellow dots denote the commensurate case.

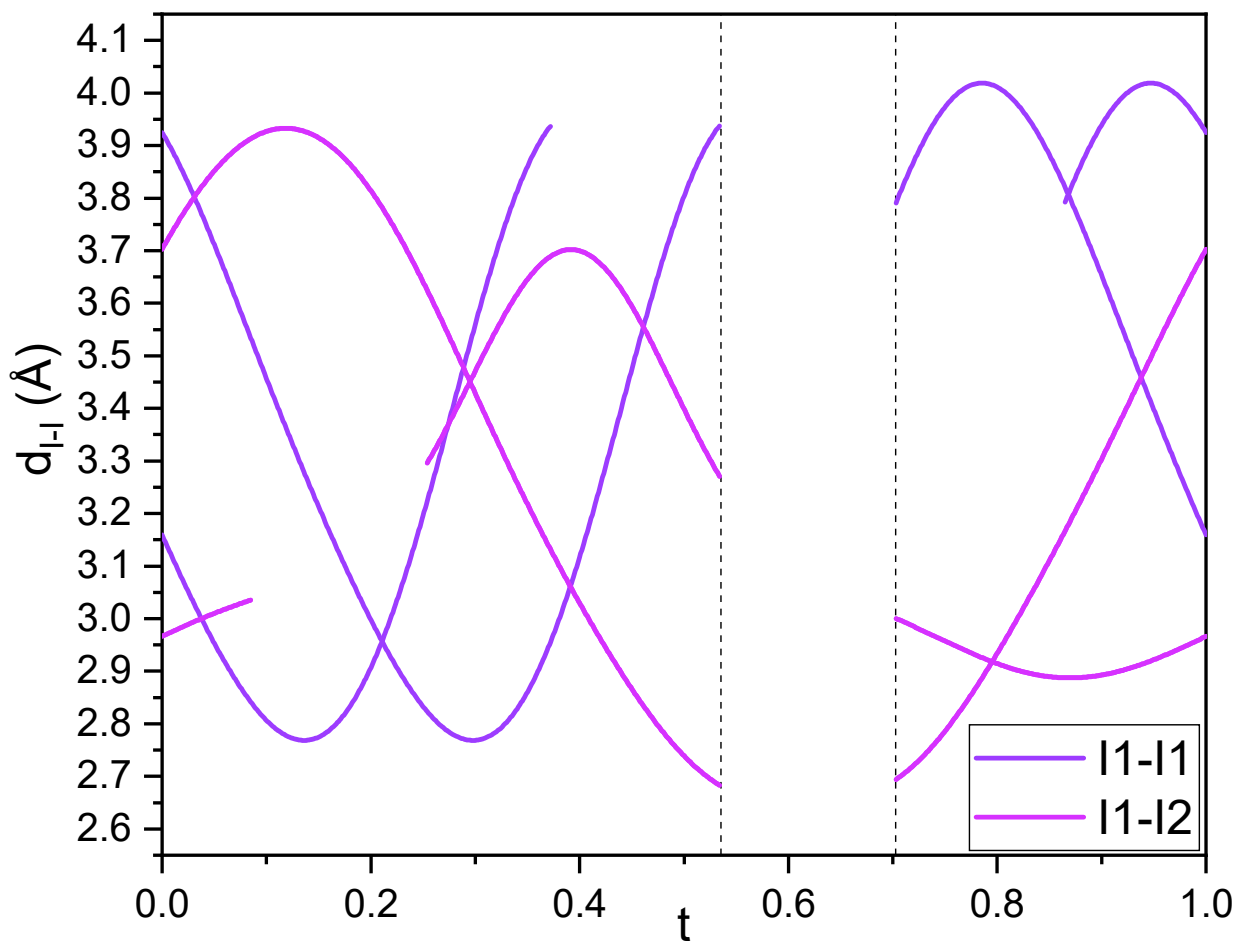

Figure S2.  $t$  plots of the distances for I1-I1 and I1-I2 in grey with crenel limits marked as dashed vertical line.

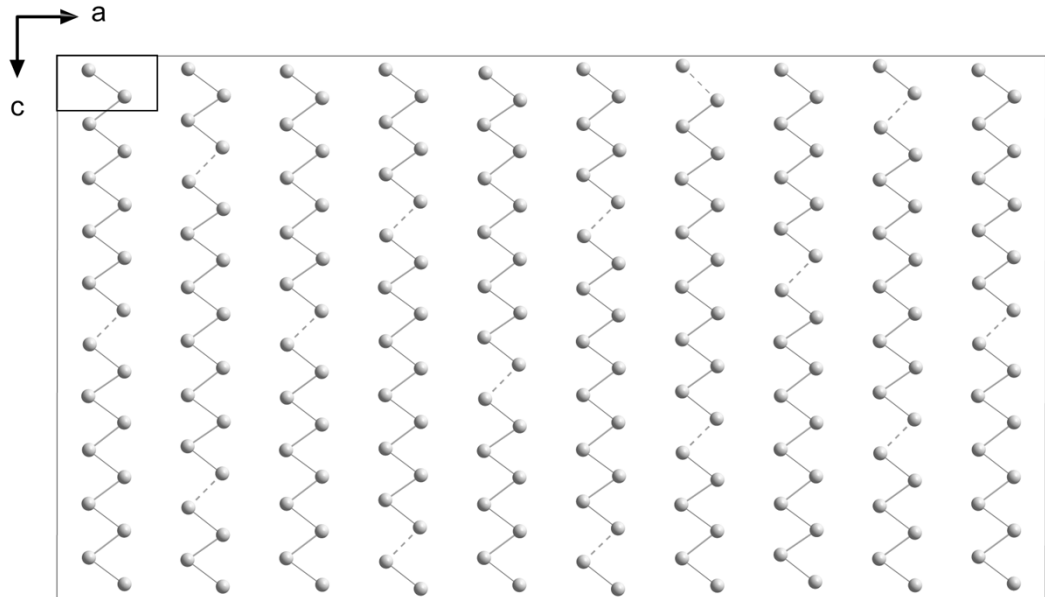

Figure S3. Section of the incommensurate  $WTe_2I$  structure showing only one layer of tungsten atoms with long bonds indicated as dashed lines. The unit cell is highlighted in the top left corner.

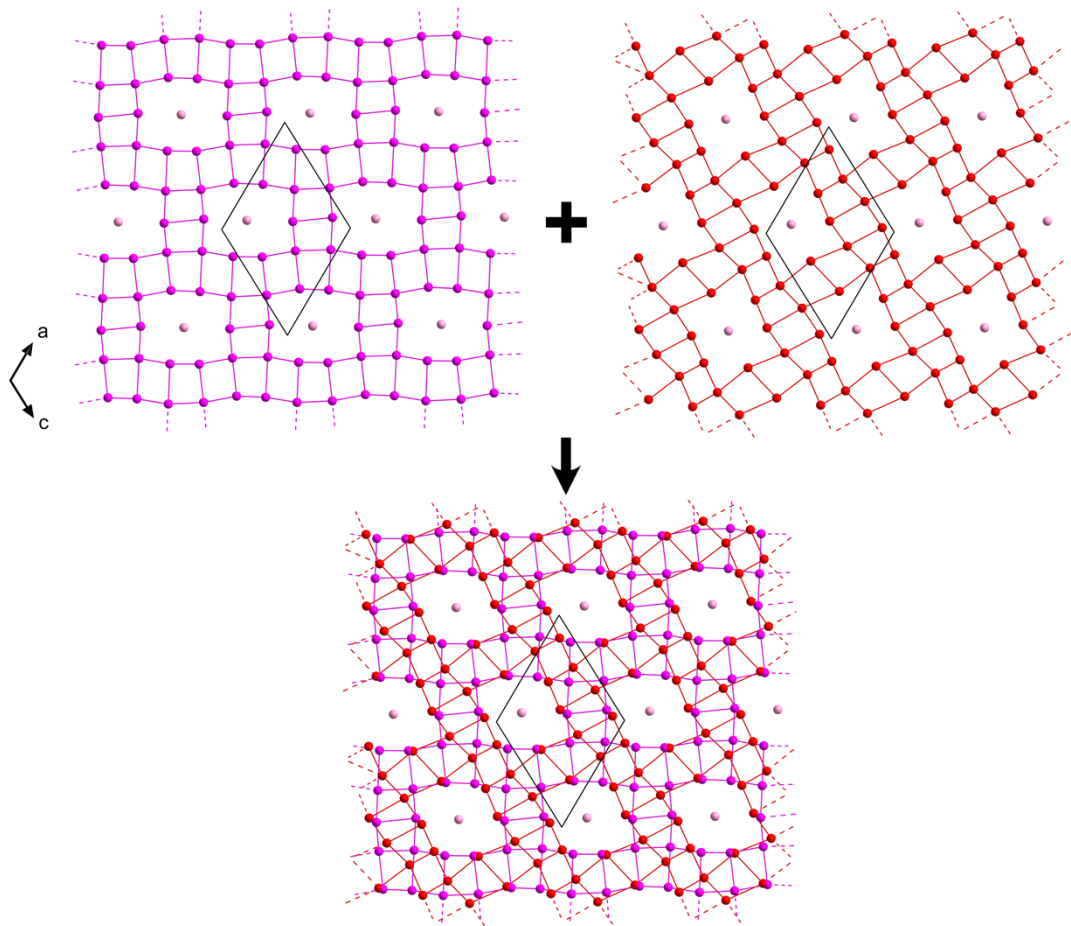

Figure S4. Sections of the  $WTe_2I$  supercell structure illustrating the iodine-layer disorder model. The top panels show the two disorder components separately (part a, purple; part b, red), while the bottom panel displays the combined iodine layer. Out-of-plane iodine atoms are highlighted in light purple. The structure is viewed along the  $b$ -axis, with the unit cell outlined.

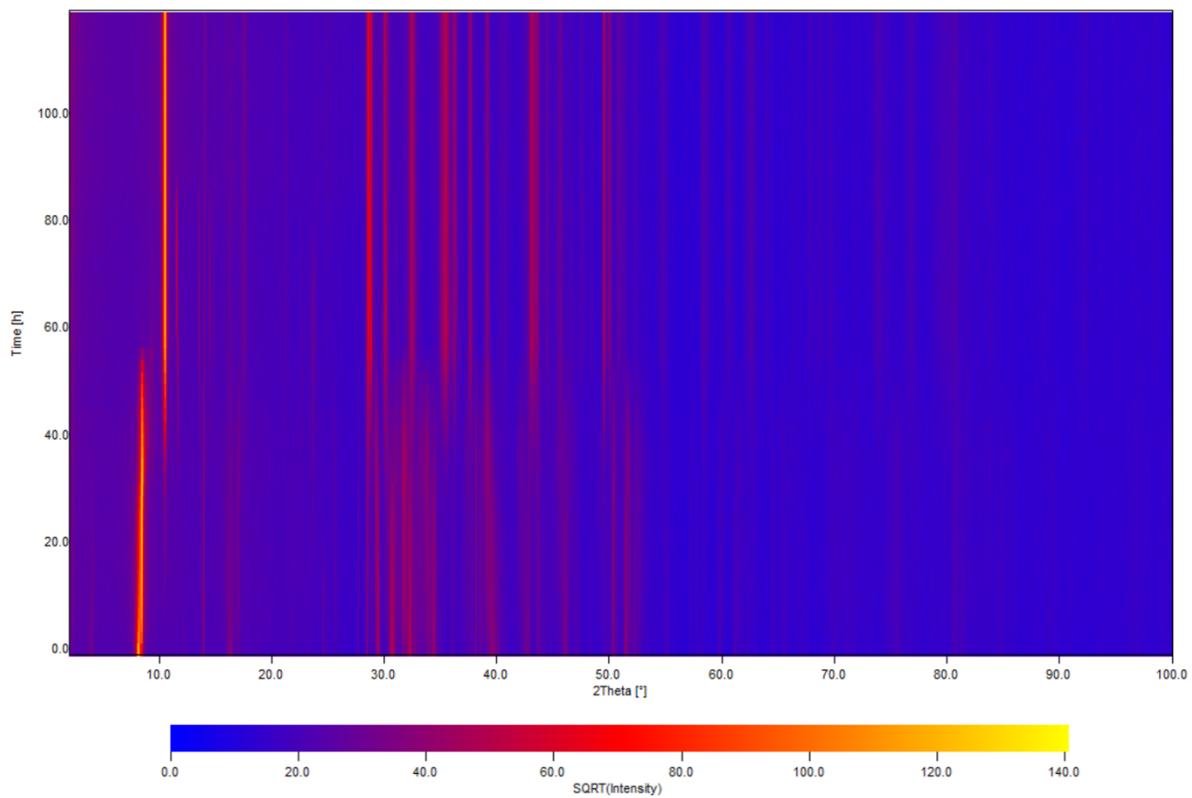

Figure S5. Time resolved PXRD analysis of  $WTe_2Br_x$  showing structural evolution while bromine deintercalation.

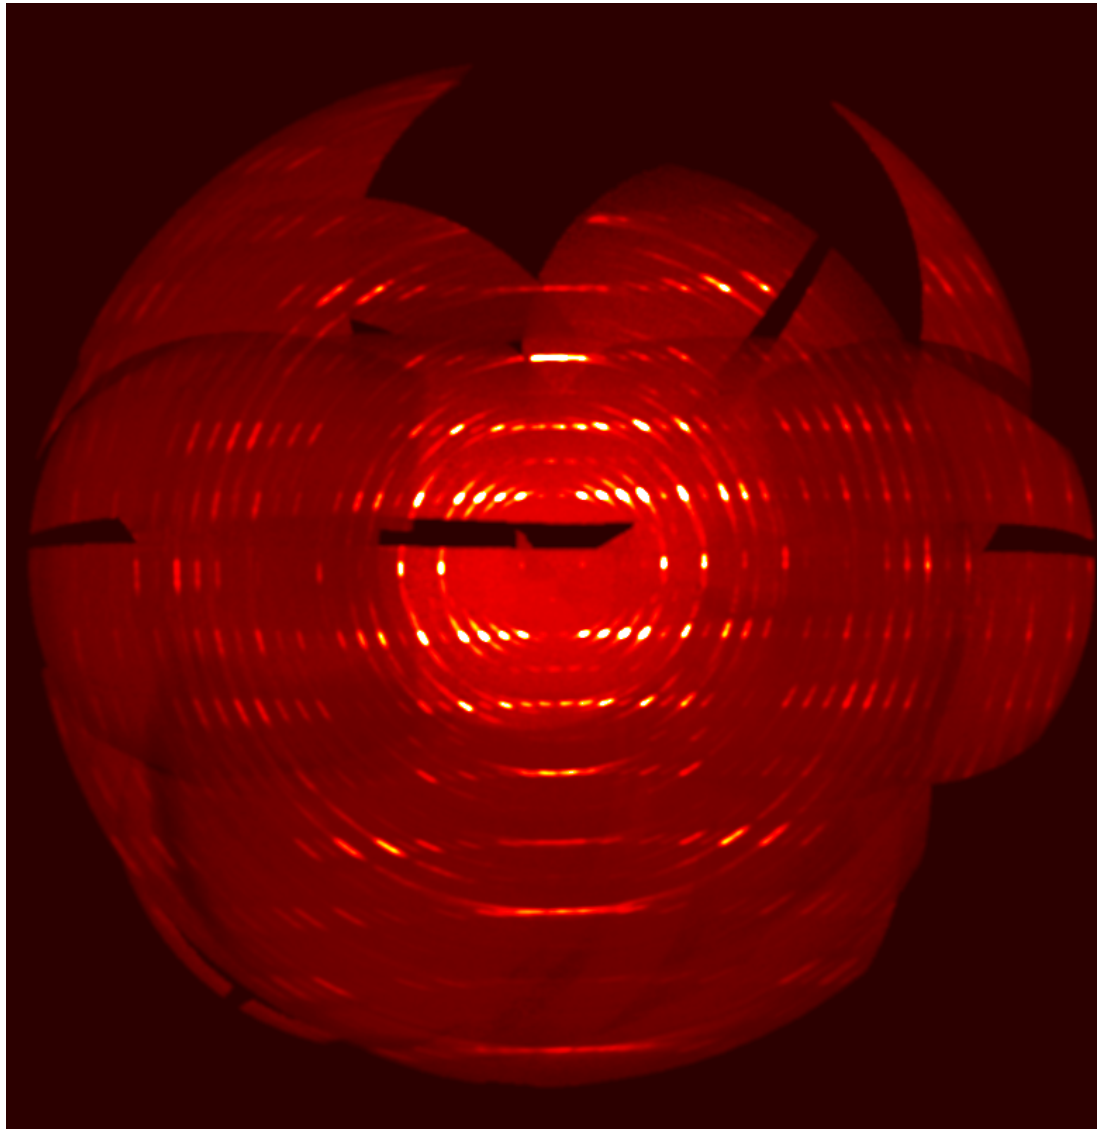

Figure S6. Reconstruction of the  $(-3kn)$  of the reciprocal-space plane of  $\text{WTe}_2\text{Br}_{1.25}$ , highlighting reduced crystallinity due to multiple phase transitions.

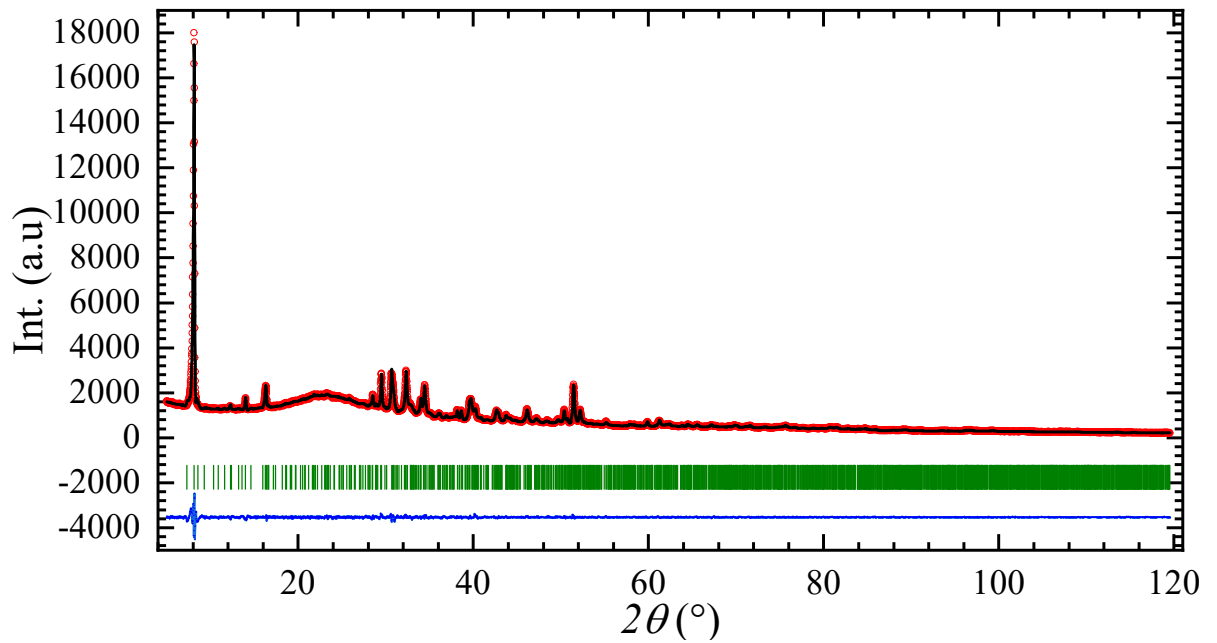

Figure S7. Rietveld refinement of  $\text{WTe}_2\text{Br}_{1.25}$  using SXRD results for lattice and position parameters. The refinement shows a good agreement of PXRD and SXRD results.

# Specialized Transmission Sample Holder

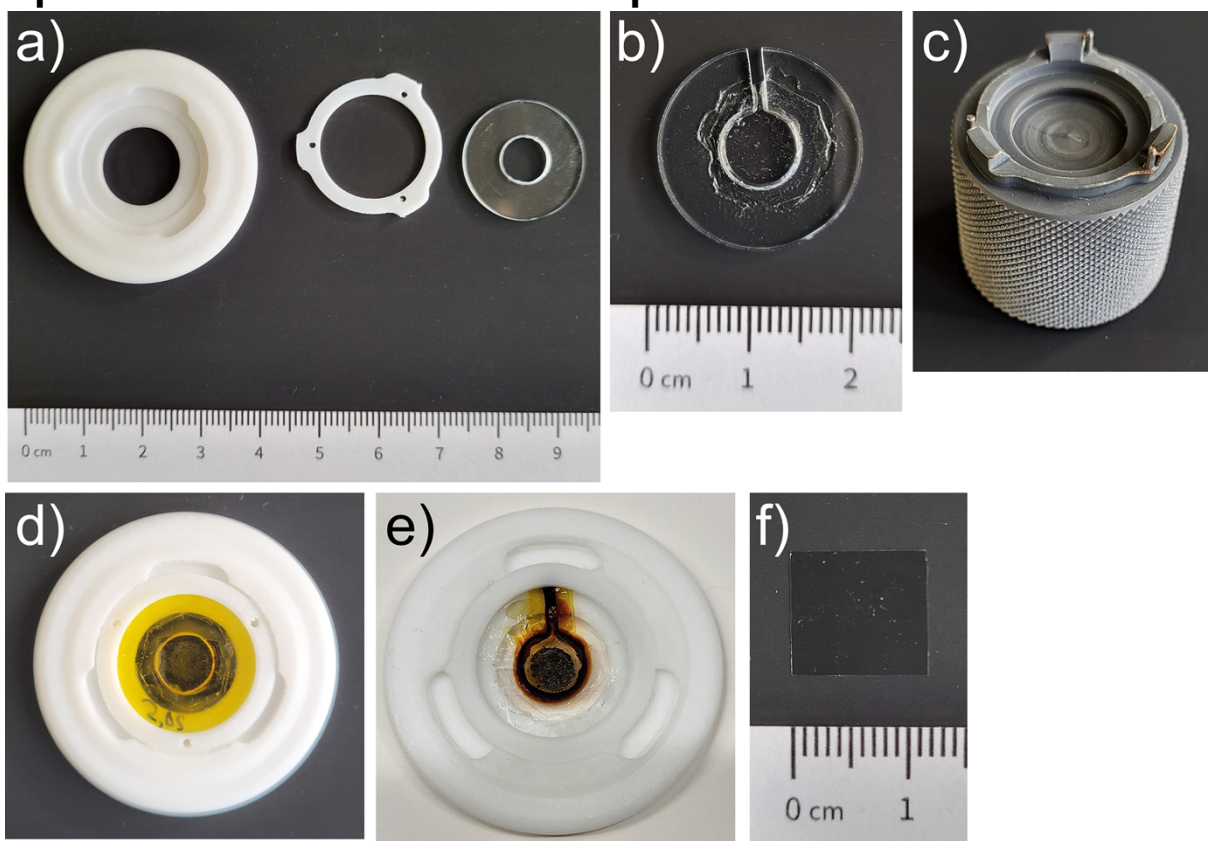

Figure S8. Components and assembly of the redesigned transmission sample holder. (a) PTFE rotor disc, PTFE counter disc, and glass disc. (b) Glass disc with an insertion slit and an ultrathin-glass window bonded to one side. (c) Assembly aid. (d) Transmission holder equipped with an assembled rotor disc (ultrathin glass on one side and Kapton on the other). (e) Examples of assembled rotor discs prepared for bromine-containing samples; for experiments with excess bromine, both sides were sealed with ultrathin glass and the perimeter was sealed with wax and cyanoacrylate under argon. (f) Ultrathin-glass window (Schott AF 32®).

## Exploded view drawing

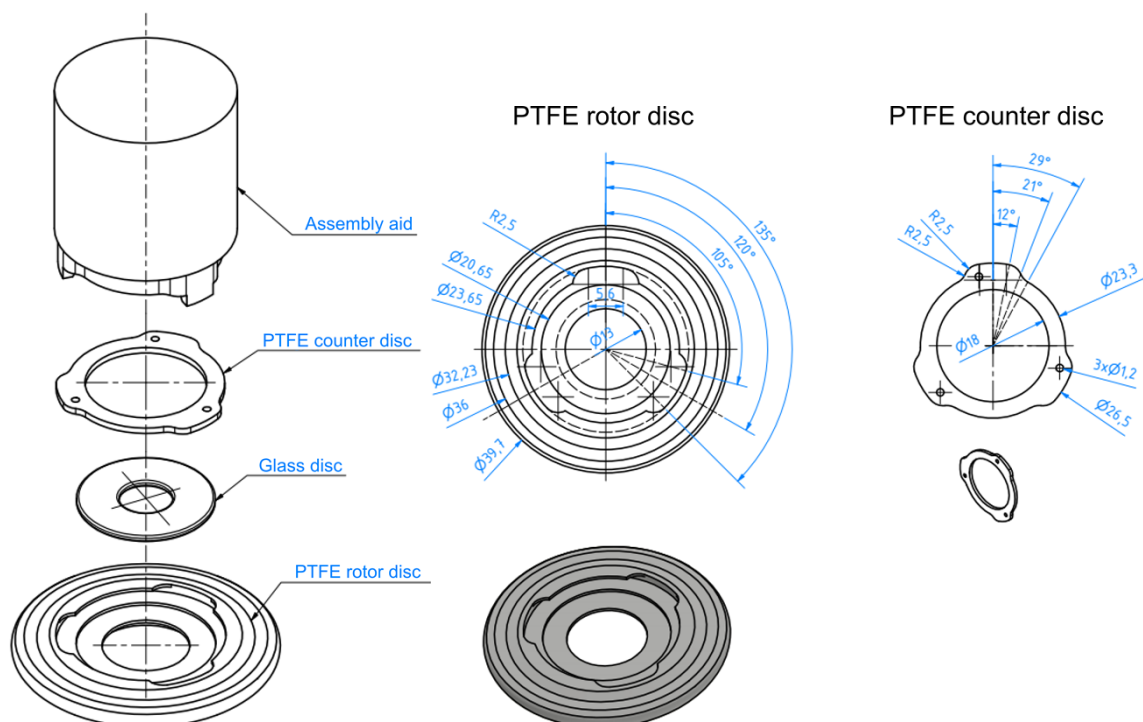

### Assembly aid

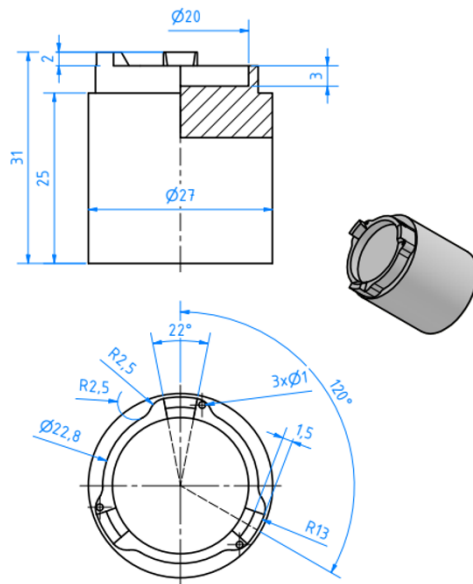

### Glas disc

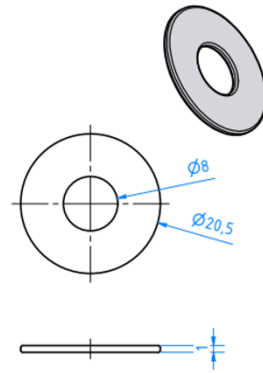

Figure S9. Engineering drawing of the redesigned transmission holder components (PTFE rotor disc, PTFE counter disc, glass disc, and assembly aid), including an exploded view and key dimensions (mm).

## Crystallographic details for $WTe_2I$ (supercell)

**Table S1:** Fractional Atomic Coordinates ( $\times 10^4$ ) and Equivalent Isotropic Displacement Parameters ( $\text{\AA}^2 \times 10^3$ ) for  $WTe_2I$  (supercell).  $U_{eq}$  is defined as  $1/3$  of the trace of the orthogonalised  $U_j$ .

| Atom | x           | y          | z           | $U_{eq}$ |
|------|-------------|------------|-------------|----------|
| W1   | 10340.8(7)  | 10074.9(3) | 11376.4(7)  | 7.57(13) |
| W2   | 12243.8(8)  | 10053.4(4) | 9537.5(8)   | 8.11(14) |
| W3   | 18784.5(7)  | 10050.7(4) | 13031.9(8)  | 7.03(13) |
| W4   | 16172.5(7)  | 9956.1(4)  | 12038.8(8)  | 7.31(13) |
| W5   | 17157.2(7)  | 10038.2(4) | 14661.4(8)  | 7.08(13) |
| W6   | 14525.4(6)  | 9978.7(3)  | 13694.4(6)  | 6.94(11) |
| Te1  | 9174.9(11)  | 9090.6(5)  | 10028.2(11) | 8.51(18) |
| Te2  | 12484.8(13) | 10971.8(6) | 8234.0(12)  | 9.0(2)   |
| Te3  | 15801.4(13) | 9057.9(6)  | 13340.0(12) | 8.5(2)   |
| Te4  | 14134.7(11) | 9056.6(5)  | 14952.2(11) | 7.95(18) |
| Te5  | 17459.0(13) | 10958.6(6) | 13354.1(12) | 8.2(2)   |
| Te6  | 9010.4(12)  | 10972.9(6) | 11644.3(12) | 7.4(2)   |
| Te7  | 10862.9(11) | 9332.5(6)  | 13394.7(12) | 7.9(2)   |
| Te8  | 20758.1(12) | 10691.9(6) | 14936.8(12) | 7.6(2)   |
| Te9  | 17602.7(11) | 9298.0(5)  | 16706.1(11) | 7.33(18) |
| Te10 | 14124.3(12) | 10697.7(6) | 11583.2(12) | 8.0(2)   |
| Te11 | 14260.3(12) | 9310.0(6)  | 10046.9(12) | 7.9(2)   |
| Te12 | 12502.9(11) | 9513.6(5)  | 11682.9(11) | 8.48(17) |
| I1   | 12390.5(13) | 8251.2(5)  | 11550.8(13) | 17.6(2)  |
| I2A  | 17522(5)    | 7500       | 13841(6)    | 52.0(13) |
| I3A  | 15352(3)    | 7500       | 11151(4)    | 31.9(8)  |
| I4A  | 13166(6)    | 7500       | 8826(6)     | 36.5(11) |
| I5A  | 10319(5)    | 7500       | 6530(4)     | 40.1(10) |
| I6A  | 15867(6)    | 7500       | 15192(6)    | 58.0(14) |
| I7A  | 9118(7)     | 7500       | 8110(8)     | 73.7(18) |
| I8A  | 14665(5)    | 7500       | 16743(4)    | 39.4(10) |
| I9A  | 11810(6)    | 7500       | 14423(6)    | 40.6(12) |
| I10A | 9570(4)     | 7500       | 12122(4)    | 34.9(8)  |
| I11A | 7449(5)     | 7500       | 9458(6)     | 56.5(14) |
| I2B  | 13600(20)   | 12500      | 10224(16)   | 58(5)    |
| I4B  | 14321(17)   | 12500      | 13021(15)   | 44(4)    |
| I3B  | 11067(17)   | 12500      | 8914(17)    | 44(4)    |
| I5B  | 10720(20)   | 12500      | 11142(12)   | 50(5)    |
| I6B  | 14478(12)   | 12500      | 15563(13)   | 29(3)    |
| I7B  | 10810(20)   | 12500      | 13717(12)   | 50(5)    |
| I8B  | 14046(17)   | 12500      | 17773(14)   | 38(3)    |
| I9B  | 11430(20)   | 12500      | 16481(16)   | 51(4)    |
| I10B | 12130(30)   | 7500       | 14788(16)   | 50(8)    |
| I11B | 12890(30)   | 7500       | 8436(15)    | 43(7)    |

**Table S2:** Anisotropic Displacement Parameters ( $\times 10^4$ ) for **WTe<sub>2</sub>I (supercell)**. The anisotropic displacement factor exponent takes the form:  $-2\pi^2[h^2a^*^2 \times U_{11} + \dots + 2hka^* \times b^* \times U_{12}]$

| Atom | $U_{11}$ | $U_{22}$ | $U_{33}$ | $U_{23}$ | $U_{13}$ | $U_{12}$ |
|------|----------|----------|----------|----------|----------|----------|
| W1   | 5.7(3)   | 10.2(3)  | 6.0(3)   | -0.1(2)  | 2.0(2)   | -0.5(2)  |
| W2   | 6.4(3)   | 10.8(3)  | 6.0(4)   | 0.4(3)   | 1.9(3)   | -1.0(3)  |
| W3   | 4.9(3)   | 10.9(3)  | 5.3(3)   | 0.4(3)   | 2.3(2)   | -1.1(3)  |
| W4   | 5.1(3)   | 11.3(3)  | 5.7(4)   | 0.5(3)   | 2.7(2)   | -1.2(3)  |
| W5   | 4.8(3)   | 11.1(3)  | 5.3(4)   | 0.8(3)   | 2.3(2)   | -1.3(3)  |
| W6   | 4.7(4)   | 10.6(3)  | 5.4(4)   | 0.9(2)   | 2.3(2)   | -1.4(2)  |
| Te1  | 9.9(6)   | 11.5(4)  | 3.9(5)   | 1.0(4)   | 3.1(3)   | -2.5(4)  |
| Te2  | 10.5(6)  | 11.3(6)  | 6.0(6)   | 0.5(4)   | 4.5(5)   | -1.7(4)  |
| Te3  | 11.2(6)  | 11.0(5)  | 3.9(5)   | 1.0(4)   | 4.0(4)   | -1.8(4)  |
| Te4  | 11.0(6)  | 10.6(4)  | 3.3(5)   | 1.0(4)   | 4.3(3)   | -1.7(4)  |
| Te5  | 10.5(6)  | 10.9(5)  | 4.1(5)   | 1.0(4)   | 4.1(5)   | -1.6(4)  |
| Te6  | 8.7(5)   | 10.2(5)  | 5.0(5)   | 0.4(4)   | 4.6(4)   | -1.0(4)  |
| Te7  | 3.5(5)   | 13.3(5)  | 6.6(5)   | 0.2(4)   | 2.2(4)   | -1.9(4)  |
| Te8  | 3.2(5)   | 12.1(5)  | 7.8(6)   | 0.5(4)   | 2.8(4)   | -1.7(4)  |
| Te9  | 3.4(5)   | 11.4(4)  | 7.4(5)   | 0.9(4)   | 2.7(3)   | -1.3(4)  |
| Te10 | 3.7(5)   | 11.8(5)  | 8.4(6)   | 0.9(4)   | 2.8(4)   | -1.4(4)  |
| Te11 | 3.5(5)   | 12.6(5)  | 8.1(6)   | 1.3(5)   | 3.0(4)   | -0.7(4)  |
| Te12 | 4.2(5)   | 14.5(4)  | 7.7(5)   | 0.0(4)   | 3.6(3)   | -1.5(4)  |
| I1   | 20.0(6)  | 12.4(5)  | 20.0(7)  | -1.0(5)  | 9.0(4)   | -0.2(4)  |
| I2A  | 62(3)    | 26.7(18) | 92(4)    | 0        | 57(3)    | 0        |
| I3A  | 39.1(19) | 16.2(13) | 49(2)    | 0        | 27.0(17) | 0        |
| I4A  | 49(3)    | 21.2(17) | 44(3)    | 0        | 25(3)    | 0        |
| I5A  | 63(3)    | 17.9(14) | 49(2)    | 0        | 34(2)    | 0        |
| I6A  | 91(4)    | 17.1(14) | 79(4)    | 0        | 50(3)    | 0        |
| I7A  | 100(5)   | 16.6(16) | 110(6)   | 0        | 53(4)    | 0        |
| I8A  | 65(3)    | 19.7(14) | 49(2)    | 0        | 40(2)    | 0        |
| I9A  | 53(3)    | 22.1(18) | 52(4)    | 0        | 29(3)    | 0        |
| I10A | 46(2)    | 17.4(13) | 54(2)    | 0        | 34.1(18) | 0        |
| I11A | 64(3)    | 29.3(19) | 99(4)    | 0        | 58(3)    | 0        |
| I2B  | 91(15)   | 53(10)   | 29(8)    | 0        | 26(9)    | 0        |
| I4B  | 55(10)   | 29(6)    | 34(7)    | 0        | 9(7)     | 0        |
| I3B  | 56(10)   | 27(7)    | 51(10)   | 0        | 27(8)    | 0        |
| I5B  | 97(13)   | 11(5)    | 10(5)    | 0        | -2(7)    | 0        |
| I6B  | 31(3)    | 25(3)    | 26(3)    | 0        | 10(2)    | 0        |
| I7B  | 85(14)   | 37(7)    | 10(5)    | 0        | 6(6)     | 0        |
| I8B  | 67(10)   | 18(5)    | 33(7)    | 0        | 27(7)    | 0        |
| I9B  | 86(14)   | 43(8)    | 39(8)    | 0        | 42(9)    | 0        |
| I10B | 73(16)   | 26(8)    | 7(6)     | 0        | -19(7)   | 0        |
| I11B | 70(15)   | 19(7)    | 5(7)     | 0        | -13(7)   | 0        |

**Table S3:** Bond Lengths in Å for **WTe<sub>2</sub>I** (supercell).

| Atom | Atom              | Length / Å | Atom | Atom             | Length / Å |
|------|-------------------|------------|------|------------------|------------|
| W1   | W1 <sup>1</sup>   | 3.0734(14) | W5   | Te5              | 2.6953(15) |
| W1   | W2 <sup>1</sup>   | 2.8219(10) | W5   | Te7 <sup>2</sup> | 2.8304(15) |
| W1   | Te1               | 2.6803(13) | W5   | Te8 <sup>5</sup> | 2.8419(15) |
| W1   | Te1 <sup>1</sup>  | 2.7458(15) | W5   | Te9              | 2.8035(14) |
| W1   | Te6               | 2.6604(15) | W6   | W6 <sup>2</sup>  | 2.8355(14) |
| W1   | Te7               | 2.7622(14) | W6   | Te3              | 2.6978(16) |
| W1   | Te9 <sup>2</sup>  | 2.8591(13) | W6   | Te4              | 2.7049(14) |
| W1   | Te12              | 2.7676(14) | W6   | Te4 <sup>2</sup> | 2.7085(13) |
| W2   | W3 <sup>3</sup>   | 2.7874(10) | W6   | Te9 <sup>2</sup> | 2.8771(14) |
| W2   | Te1 <sup>1</sup>  | 2.7594(16) | W6   | Te10             | 2.8554(14) |
| W2   | Te2               | 2.6596(15) | W6   | Te12             | 2.7383(12) |
| W2   | Te6 <sup>1</sup>  | 2.7211(16) | Te12 | I1               | 2.7663(15) |
| W2   | Te10              | 2.8528(16) | I2A  | I3A              | 3.111(8)   |
| W2   | Te11              | 2.7641(15) | I2A  | I6A              | 3.136(8)   |
| W2   | Te12              | 2.7478(15) | I3A  | I4A              | 2.846(7)   |
| W3   | W4                | 2.8361(11) | I5A  | I7A              | 2.906(9)   |
| W3   | Te2 <sup>3</sup>  | 2.7492(16) | I6A  | I8A              | 2.875(7)   |
| W3   | Te5               | 2.6997(16) | I7A  | I11A             | 3.148(10)  |
| W3   | Te6 <sup>4</sup>  | 2.7259(15) | I9A  | I10A             | 2.863(8)   |
| W3   | Te7 <sup>4</sup>  | 2.8329(15) | I10A | I11A             | 3.068(8)   |
| W3   | Te8 <sup>5</sup>  | 2.7905(15) | I2B  | I4B              | 3.10(2)    |
| W3   | Te8               | 2.8190(15) | I2B  | I3B              | 2.73(3)    |
| W4   | W5                | 2.8479(10) | I4B  | I6B              | 3.01(2)    |
| W4   | Te2 <sup>3</sup>  | 2.7213(16) | I3B  | I5B              | 2.93(3)    |
| W4   | Te3               | 2.6904(15) | I5B  | I7B              | 3.09(2)    |
| W4   | Te5               | 2.7388(16) | I6B  | I8B              | 2.97(2)    |
| W4   | Te10              | 2.8055(15) | I7B  | I9B              | 3.09(2)    |
| W4   | Te11              | 2.8387(16) | I8B  | I9B              | 2.82(3)    |
| W4   | Te11 <sup>3</sup> | 2.8393(15) |      |                  |            |
| W5   | W6                | 2.8572(11) |      |                  |            |
| W5   | Te3               | 2.7292(16) |      |                  |            |
| W5   | Te4 <sup>2</sup>  | 2.7022(16) |      |                  |            |

<sup>1</sup>2-x,2-y,2-z; <sup>2</sup>3-x,2-y,3-z; <sup>3</sup>3-x,2-y,2-z; <sup>4</sup>1+x,+y,+z; <sup>5</sup>4-x,2-y,3-z

Table S4: Atomic Occupancies for all atoms that are not fully occupied in **WTe<sub>2</sub>** (supercell).

| <b>Atom</b> | <b>Occupancy</b> | <b>Atom</b> | <b>Occupancy</b> |
|-------------|------------------|-------------|------------------|
| I2A         | 0.803(4)         | I2B         | 0.197(4)         |
| I3A         | 0.803(4)         | I4B         | 0.197(4)         |
| I4A         | 0.803(4)         | I3B         | 0.197(4)         |
| I5A         | 0.803(4)         | I5B         | 0.197(4)         |
| I6A         | 0.803(4)         | I6B         | 0.197(4)         |
| I7A         | 0.803(4)         | I7B         | 0.197(4)         |
| I8A         | 0.803(4)         | I8B         | 0.197(4)         |
| I9A         | 0.803(4)         | I9B         | 0.197(4)         |
| I10A        | 0.803(4)         | I10B        | 0.197(4)         |
| I11A        | 0.803(4)         | I11B        | 0.197(4)         |

## Crystallographic details for incommensurate $WTe_2$

Table S5: Occupational waves for incommensurate  $WTe_2$ .

| Atom | Wave/Parameter | Occ       |
|------|----------------|-----------|
| Te2  | delta          | 0.8318(8) |
|      | x40            | 0.2710(4) |
| Te3  | delta          | 0.1682(8) |
|      | x40            | 0.7754(5) |
| I1   | delta          | 0.8318(8) |
|      | x40            | 0.3929(4) |
| I2   | delta          | 0.8318(8) |
|      | x40            | 0.1633(4) |
| I3   | delta          | 0.1682(8) |
|      | x40            | 0.7865(4) |

Table S6: Positional parameters for incommensurate  $WTe_2$ .

| Atom | Occ         | Wave | x            | y             | z            | Ueq/Uiso   |
|------|-------------|------|--------------|---------------|--------------|------------|
| W1   | 1           |      | 0.32142(3)   | 0.495374(9)   | 0.25174(13)  | 0.00479(7) |
|      |             | s,1  | -0.00194(5)  | 0.001783(16)  | -0.0072(12)  |            |
|      |             | c,1  | 0.00190(5)   | -0.001740(16) | -0.0085(10)  |            |
|      |             | s,2  | -0.00203(5)  | -0.000332(16) | 0.0046(2)    |            |
|      |             | c,2  | 0.00211(5)   | -0.000476(16) | 0.0091(8)    |            |
|      |             | s,3  | -0.0010(3)   | 0.00067(8)    | -0.0068(9)   |            |
|      |             | c,3  | 0.0032(2)    | -0.00036(7)   | 0.0057(11)   |            |
|      |             | s,4  | 0            | 0             | -0.067(2)    |            |
|      |             | c,4  | 0.3826(5)    | 1             | 0            |            |
|      |             | Te1  | 1            |               | 0.57919(5)   |            |
| s,1  | -0.00264(8) |      |              | 0.00038(3)    | 0.02596(15)  |            |
| c,1  | -0.01089(8) |      |              | -0.00028(3)   | -0.01238(15) |            |
| s,2  | 0.00422(8)  |      |              | -0.00187(3)   | 0.00920(15)  |            |
| c,2  | 0.00324(8)  |      |              | -0.00144(3)   | -0.00400(16) |            |
| Te2  | 0.8318(8)   |      | 0.07022(7)   | 0.56927(2)    | 0.7492(2)    | 0.00552(9) |
|      |             | o,1  | -0.00111(10) | 0.00106(3)    | 0.0018(2)    |            |
|      |             | o,2  | 0.00011(6)   | -0.00041(2)   | -0.00017(12) |            |
|      |             | o,3  | -0.00154(8)  | 0.00046(3)    | -0.01128(14) |            |
| Te3  | 0.1682(8)   | o,4  | 0.00000(13)  | -0.00028(4)   | 0.0047(3)    | 0.0056(4)  |
|      |             | o,1  | 0.0817(4)    | 0.54812(10)   | 0.7526(8)    |            |
| Te3  | 0.1682(8)   | o,2  | -0.0013(5)   | -0.00001(17)  | -0.0011(13)  | 0.0056(4)  |
|      |             | o,1  | -0.001(3)    | 0.0001(8)     | 0.006(6)     |            |
| I1   | 0.8318(8)   |      | 0.34767(14)  | 0.75          | 0.7591(4)    | 0.0218(3)  |
|      |             | o,1  | 0.02889(15)  | 0             | 0.0932(3)    |            |
|      |             | o,2  | -0.01800(15) | 0             | -0.0089(4)   |            |
|      |             | o,3  | 0.0001(2)    | 0             | -0.0335(4)   |            |
|      |             | o,4  | 0.00596(17)  | 0             | -0.0221(4)   |            |
|      |             | o,5  | 0.0008(3)    | 0             | 0.0010(5)    |            |
|      |             | o,6  | -0.0026(2)   | 0             | -0.0113(5)   |            |
| I2   | 0.8318(8)   |      | -0.17524(15) | 0.75          | 0.7370(4)    | 0.0254(3)  |
|      |             | o,1  | -0.03392(15) | 0             | -0.0879(3)   |            |
|      |             | o,2  | -0.00962(16) | 0             | 0.0148(4)    |            |
|      |             | o,3  | -0.00434(19) | 0             | -0.0074(5)   |            |
|      |             | o,4  | -0.0032(2)   | 0             | 0.0410(5)    |            |
|      |             | o,5  | -0.0020(2)   | 0             | -0.0104(6)   |            |
| I3   | 0.1682(8)   | o,6  | -0.0011(3)   | 0             | -0.0055(5)   | 0.0151(3)  |
|      |             | o,1  | 0.1052(2)    | 0.67498(7)    | 0.7481(5)    |            |
| I3   | 0.1682(8)   | o,1  | -0.0031(8)   | -0.0001(2)    | 0.0282(15)   | 0.0151(3)  |

o,2                    -0.004(4)                    0.0007(12)                    -0.004(7)

Table S7: ADP harmonic parameters for incommensurate WTe<sub>2</sub>l.

| Atom | Wave | U11          | U22          | U33          | U12          | U13          | U23          |
|------|------|--------------|--------------|--------------|--------------|--------------|--------------|
| W1   |      | 0.00241(9)   | 0.00714(9)   | 0.00482(17)  | -0.00014(6)  | -0.00143(14) | 0.00020(12)  |
|      | s,1  | -0.00019(12) | 0.00021(13)  | -0.0004(2)   | 0.00008(11)  | 0.00026(12)  | -0.00021(13) |
|      | c,1  | 0.00005(12)  | -0.00017(14) | 0.00099(17)  | -0.00011(11) | -0.00007(13) | -0.00023(13) |
| Te1  |      | 0.00502(12)  | 0.00856(13)  | 0.00596(13)  | -0.00101(10) | -0.0012(2)   | -0.0002(2)   |
|      | s,1  | 0.0010(2)    | 0.0013(2)    | 0.0005(2)    | -0.00105(18) | -0.00049(16) | 0.00068(17)  |
|      | c,1  | 0.0012(2)    | 0.0029(2)    | 0.0015(2)    | -0.00243(17) | 0.00108(17)  | -0.00133(17) |
| Te2  |      | 0.00326(14)  | 0.00726(16)  | 0.00603(15)  | 0.00004(13)  | -0.0015(3)   | -0.0002(3)   |
|      | o,1  | -0.00010(18) | -0.0005(2)   | 0.0018(2)    | 0.00021(17)  | 0.00013(15)  | 0.00003(19)  |
|      | o,2  | -0.00001(16) | 0.00011(18)  | -0.00068(18) | 0.00009(14)  | -0.00018(13) | -0.00017(14) |
| Te3  |      | 0.0031(4)    | 0.0086(6)    | 0.0050(9)    | -0.0011(5)   | -0.0010(5)   | 0.0001(6)    |
| I1   |      | 0.0176(4)    | 0.0156(3)    | 0.0323(6)    | 0            | -0.0053(4)   | 0            |
|      | o,1  | 0.0024(4)    | -0.0014(4)   | 0.0101(6)    | 0            | -0.0048(4)   | 0            |
|      | o,2  | 0.0025(5)    | -0.0015(4)   | -0.0115(7)   | 0            | 0.0078(5)    | 0            |
| I2   |      | 0.0183(4)    | 0.0158(3)    | 0.0419(7)    | 0            | -0.0045(4)   | 0            |
|      | o,1  | 0.0024(4)    | -0.0014(4)   | 0.0123(7)    | 0            | -0.0090(4)   | 0            |
|      | o,2  | -0.0010(5)   | 0.0016(4)    | 0.0149(6)    | 0            | -0.0041(5)   | 0            |
| I3   |      | 0.0174(6)    | 0.0089(5)    | 0.0191(7)    | -0.0002(4)   | -0.0017(5)   | 0.0005(5)    |



Table S9: List of distances for incommensurate WTe<sub>2</sub>I.

|                       | average / Å    | min / Å   | max / Å   |
|-----------------------|----------------|-----------|-----------|
| W1-W1 <sup>i</sup>    | 2.870(11)      | 2.781(16) | 3.097(16) |
| W1-W1 <sup>ii</sup>   | 2.846(11)      | 2.830(14) | 2.862(14) |
| W1-Te1                | 2.720(3)       | 2.684(3)  | 2.755(3)  |
| W1-Te1 <sup>i</sup>   | 2.706(8)       | 2.555(12) | 2.856(12) |
| W1-Te1 <sup>ii</sup>  | 2.702(8)       | 2.543(12) | 2.851(12) |
| W1-Te2 <sup>iii</sup> | 2.820(7)       | 2.749(9)  | 2.905(9)  |
| W1-Te2                | 2.819(7)       | 2.739(9)  | 2.889(9)  |
| W1-Te2 <sup>iv</sup>  | 2.845(3)       | 2.813(3)  | 2.877(3)  |
| W1-Te3 <sup>iii</sup> | 2.76(4)        | 2.73(7)   | 2.78(7)   |
| W1-Te3                | 2.73(4)        | 2.45(7)   | 2.78(7)   |
| W1-Te3 <sup>iv</sup>  | 2.74(3)        | 2.73(6)   | 2.74(6)   |
| Te3-I3                | 2.77(3)        | 2.76(6)   | 2.79(6)   |
| I1-I1 <sup>iii</sup>  | 3.415(6)       | 2.769(8)  | 4.018(8)  |
| I1-I1 <sup>v</sup>    | 3.405(6)       | 2.769(8)  | 4.018(8)  |
| I1-I2                 | 3.341(6)       | 2.688(8)  | 3.933(8)  |
| I1-I2 <sup>vi</sup>   | 3.189(6)       | 2.887(8)  | 3.702(8)  |
| I1-I2 <sup>vii</sup>  | 3.341(6)       | 2.688(8)  | 3.933(8)  |
| I1-I2 <sup>viii</sup> | 3.189(6)       | 2.887(8)  | 3.702(8)  |
| I1-I3 <sup>iii</sup>  | 4.084(9)       | 4.011(15) | 4.255(15) |
| I1-I3 <sup>v</sup>    | 4.297(9)       | 4.140(13) | 4.407(13) |
| I1-I3 <sup>ix</sup>   | 4.084(9)       | 4.011(15) | 4.255(15) |
| I1-I3 <sup>x</sup>    | 4.297(9)       | 4.140(13) | 4.407(13) |
| I2-I2 <sup>iii</sup>  | 3.419(7)       | 2.765(9)  | 4.028(9)  |
| I2-I2 <sup>v</sup>    | 3.416(7)       | 2.765(9)  | 4.029(9)  |
| I2-I2 <sup>ix</sup>   | 3.419(7)       | 2.765(9)  | 4.028(9)  |
| I2-I2 <sup>vii</sup>  | 0              | 0         | 0         |
| I2-I2 <sup>x</sup>    | 3.416(7)       | 2.765(9)  | 4.029(9)  |
| I2-I3 <sup>v</sup>    | 4.123(8)       | 4.064(14) | 4.250(14) |
| I2-I3 <sup>x</sup>    | 4.123(8)       | 4.064(14) | 4.250(14) |
| I3-I3 <sup>iii</sup>  | 3.659(15)      | 3.659(15) | 3.659(15) |
| I3-I3 <sup>v</sup>    | 3.658(15)      | 3.658(15) | 3.658(15) |
| I3-I3 <sup>vii</sup>  | 3.272(11)      | 3.24(2)   | 3.29(2)   |
| (i)                   | -x+1,-y+1,-z   |           |           |
| (ii)                  | -x+1,-y+1,-z+1 |           |           |
| (iii)                 | x,y,z-1        |           |           |
| (iv)                  | -x,-y+1,-z+1   |           |           |
| (v)                   | x,y,z+1        |           |           |
| (vi)                  | x+1,y,z        |           |           |
| (vii)                 | x,-y+3/2,z     |           |           |
| (viii)                | x+1,-y+3/2,z   |           |           |
| (ix)                  | x,-y+3/2,z-1   |           |           |
| (x)                   | x,-y+3/2,z+1   |           |           |
| (xi)                  | x-1,y,z        |           |           |

Table S10: List of angles for incommensurate WTe<sub>2</sub>l.

|                                          | average / ° | min / °    | max / °    |
|------------------------------------------|-------------|------------|------------|
| W1 <sup>i</sup> -W1-W1 <sup>ii</sup>     | 74.7(3)     | 70.4(3)    | 83.2(3)    |
| W1 <sup>i</sup> -W1-Te1                  | 57.78(14)   | 55.55(17)  | 59.50(17)  |
| W1 <sup>i</sup> -W1-Te1 <sup>i</sup>     | 58.3(2)     | 53.7(2)    | 60.5(3)    |
| W1 <sup>i</sup> -W1-Te1 <sup>ii</sup>    | 104.93(15)  | 102.07(12) | 110.76(16) |
| W1 <sup>i</sup> -W1-Te2 <sup>iii</sup>   | 93.3(3)     | 90.1(4)    | 96.5(4)    |
| W1 <sup>i</sup> -W1-Te2                  | 140.27(13)  | 137.64(16) | 143.27(12) |
| W1 <sup>i</sup> -W1-Te2 <sup>iv</sup>    | 136.1(4)    | 127.6(5)   | 142.3(5)   |
| W1 <sup>i</sup> -W1-Te3 <sup>iii</sup>   | 82.2(14)    | 81.4(14)   | 89.2(14)   |
| W1 <sup>i</sup> -W1-Te3                  | 145.6(13)   | 145.2(14)  | 146.3(13)  |
| W1 <sup>i</sup> -W1-Te3 <sup>iv</sup>    | 139.1(15)   | 138.6(15)  | 140.2(15)  |
| W1 <sup>ii</sup> -W1-Te1                 | 58.04(14)   | 54.70(18)  | 61.91(19)  |
| W1 <sup>ii</sup> -W1-Te1 <sup>i</sup>    | 104.74(15)  | 100.93(13) | 110.0(2)   |
| W1 <sup>ii</sup> -W1-Te1 <sup>ii</sup>   | 58.6(2)     | 56.8(3)    | 59.9(3)    |
| W1 <sup>ii</sup> -W1-Te2 <sup>iii</sup>  | 140.51(12)  | 137.11(13) | 144.01(11) |
| W1 <sup>ii</sup> -W1-Te2                 | 92.9(3)     | 90.2(4)    | 94.1(3)    |
| W1 <sup>ii</sup> -W1-Te2 <sup>iv</sup>   | 137.0(4)    | 133.2(6)   | 141.6(5)   |
| W1 <sup>ii</sup> -W1-Te3 <sup>iii</sup>  | 145.8(12)   | 145.2(12)  | 146.6(13)  |
| W1 <sup>ii</sup> -W1-Te3                 | 87.4(14)    | 86.4(14)   | 93.9(16)   |
| W1 <sup>ii</sup> -W1-Te3 <sup>iv</sup>   | 138.3(15)   | 138.0(15)  | 138.7(15)  |
| Te1-W1-Te1 <sup>i</sup>                  | 116.1(3)    | 109.3(4)   | 119.9(3)   |
| Te1-W1-Te1 <sup>ii</sup>                 | 116.6(3)    | 111.1(4)   | 121.3(3)   |
| Te1-W1-Te2 <sup>iii</sup>                | 83.74(15)   | 81.31(14)  | 86.70(13)  |
| Te1-W1-Te2                               | 83.82(14)   | 81.73(17)  | 86.06(14)  |
| Te1-W1-Te2 <sup>iv</sup>                 | 155.34(14)  | 152.2(3)   | 159.93(11) |
| Te1-W1-Te3 <sup>iii</sup>                | 85.2(12)    | 83.5(12)   | 87.7(13)   |
| Te1-W1-Te3                               | 87.0(13)    | 85.8(13)   | 91.8(14)   |
| Te1-W1-Te3 <sup>iv</sup>                 | 151.2(13)   | 149.5(13)  | 152.0(13)  |
| Te1 <sup>i</sup> -W1-Te1 <sup>ii</sup>   | 79.86(7)    | 77.14(7)   | 84.58(9)   |
| Te1 <sup>i</sup> -W1-Te2 <sup>iii</sup>  | 99.9(3)     | 95.4(4)    | 104.4(5)   |
| Te1 <sup>i</sup> -W1-Te2                 | 158.24(13)  | 156.7(3)   | 160.69(10) |
| Te1 <sup>i</sup> -W1-Te2 <sup>iv</sup>   | 81.23(16)   | 79.4(2)    | 84.66(17)  |
| Te1 <sup>i</sup> -W1-Te3 <sup>iii</sup>  | 85.8(14)    | 84.0(14)   | 88.1(14)   |
| Te1 <sup>i</sup> -W1-Te3                 | 153.9(13)   | 153.6(14)  | 154.3(12)  |
| Te1 <sup>i</sup> -W1-Te3 <sup>iv</sup>   | 85.3(14)    | 84.7(14)   | 86.3(14)   |
| Te1 <sup>ii</sup> -W1-Te2 <sup>iii</sup> | 158.39(13)  | 156.05(10) | 159.76(11) |
| Te1 <sup>ii</sup> -W1-Te2                | 100.1(3)    | 96.8(4)    | 103.8(5)   |
| Te1 <sup>ii</sup> -W1-Te2 <sup>iv</sup>  | 81.39(16)   | 78.55(14)  | 85.19(17)  |
| Te1 <sup>ii</sup> -W1-Te3 <sup>iii</sup> | 154.5(12)   | 154.2(12)  | 154.9(12)  |
| Te1 <sup>ii</sup> -W1-Te3                | 86.4(14)    | 84.5(14)   | 98.7(16)   |
| Te1 <sup>ii</sup> -W1-Te3 <sup>iv</sup>  | 85.2(14)    | 84.6(14)   | 86.1(14)   |
| Te2 <sup>iii</sup> -W1-Te2               | 75.02(8)    | 72.66(7)   | 77.19(8)   |
| Te2 <sup>iii</sup> -W1-Te2 <sup>iv</sup> | 78.53(13)   | 76.69(13)  | 80.30(15)  |
| Te2 <sup>iii</sup> -W1-Te3               | 80.7(14)    | 79.8(14)   | 81.2(13)   |
| Te2 <sup>iii</sup> -W1-Te3 <sup>iv</sup> | 71.7(14)    | 71.4(14)   | 72.2(14)   |
| Te2-W1-Te2 <sup>iv</sup>                 | 78.43(13)   | 76.87(16)  | 79.87(15)  |
| Te2-W1-Te3 <sup>iii</sup>                | 79.0(14)    | 78.4(14)   | 80.0(14)   |
| Te2-W1-Te3 <sup>iv</sup>                 | 71.8(14)    | 71.1(14)   | 72.2(14)   |
| Te2 <sup>iv</sup> -W1-Te3 <sup>iii</sup> | 71.1(12)    | 70.7(12)   | 72.2(12)   |
| Te2 <sup>iv</sup> -W1-Te3                | 71.9(13)    | 70.7(12)   | 74.8(14)   |
| Te3 <sup>iii</sup> -W1-Te3               | 82.8(16)    | 82.8(16)   | 82.8(16)   |
| W1-Te1-W1 <sup>i</sup>                   | 63.9(2)     | 61.8(3)    | 69.3(3)    |
| W1-Te1-W1 <sup>ii</sup>                  | 63.3(2)     | 61.3(3)    | 65.4(3)    |
| W1 <sup>i</sup> -Te1-W1 <sup>ii</sup>    | 79.8(3)     | 75.3(3)    | 89.7(3)    |
| W1-Te2-W1 <sup>v</sup>                   | 73.8(3)     | 71.3(3)    | 75.8(2)    |
| W1-Te2-W1 <sup>iv</sup>                  | 102.09(16)  | 99.7(2)    | 105.4(2)   |
| W1 <sup>v</sup> -Te2-W1 <sup>iv</sup>    | 102.19(16)  | 99.1(2)    | 105.36(19) |
| W1-Te3-W1 <sup>v</sup>                   | 89.9(10)    | 81.8(5)    | 90.6(17)   |

|                                          |            |            |            |
|------------------------------------------|------------|------------|------------|
| W1-Te3-W1 <sup>iv</sup>                  | 110.9(11)  | 110.1(17)  | 114.4(5)   |
| W1-Te3-I3                                | 113.4(11)  | 112(2)     | 119.1(5)   |
| W1 <sup>v</sup> -Te3-W1 <sup>iv</sup>    | 111.2(11)  | 110.1(7)   | 111.6(9)   |
| W1 <sup>v</sup> -Te3-I3                  | 114.2(11)  | 112.3(5)   | 115.4(7)   |
| W1 <sup>iv</sup> -Te3-I3                 | 114.7(10)  | 113.6(4)   | 115.3(19)  |
| I1 <sup>iii</sup> -I1-I1 <sup>v</sup>    | 176.1(2)   | 171.3(2)   | 180        |
| I1 <sup>iii</sup> -I1-I2                 | 89.3(2)    | 76.22(19)  | 107.0(2)   |
| I1 <sup>iii</sup> -I1-I2 <sup>vi</sup>   | 89.7(2)    | 82.1(2)    | 97.28(17)  |
| I1 <sup>iii</sup> -I1-I2 <sup>vii</sup>  | 89.3(2)    | 76.22(19)  | 107.0(2)   |
| I1 <sup>iii</sup> -I1-I2 <sup>viii</sup> | 89.7(2)    | 82.1(2)    | 97.28(17)  |
| I1 <sup>iii</sup> -I1-I3 <sup>v</sup>    | 154.94(10) | 152.26(10) | 156.47(8)  |
| I1 <sup>iii</sup> -I1-I3 <sup>x</sup>    | 154.94(10) | 152.26(10) | 156.47(8)  |
| I1 <sup>v</sup> -I1-I2                   | 91.0(2)    | 81.1(2)    | 100.33(17) |
| I1 <sup>v</sup> -I1-I2 <sup>vi</sup>     | 94.6(2)    | 77.28(18)  | 99.9(2)    |
| I1 <sup>v</sup> -I1-I2 <sup>vii</sup>    | 91.0(2)    | 81.1(2)    | 100.33(17) |
| I1 <sup>v</sup> -I1-I2 <sup>viii</sup>   | 94.6(2)    | 77.28(18)  | 99.9(2)    |
| I1 <sup>v</sup> -I1-I3 <sup>iii</sup>    | 149.64(11) | 148.82(13) | 151.36(8)  |
| I1 <sup>v</sup> -I1-I3 <sup>ix</sup>     | 149.64(11) | 148.82(13) | 151.36(8)  |
| I2-I1-I2 <sup>vi</sup>                   | 167.5(2)   | 155.8(2)   | 180        |
| I2-I1-I2 <sup>vii</sup>                  | 0          | 0          | 0          |
| I2-I1-I2 <sup>viii</sup>                 | 167.5(2)   | 155.8(2)   | 180        |
| I2-I1-I3 <sup>iii</sup>                  | 75.05(15)  | 72.67(16)  | 76.11(14)  |
| I2-I1-I3 <sup>v</sup>                    | 66.88(13)  | 65.76(11)  | 69.54(16)  |
| I2-I1-I3 <sup>ix</sup>                   | 75.05(15)  | 72.67(16)  | 76.11(14)  |
| I2-I1-I3 <sup>x</sup>                    | 66.88(13)  | 65.76(11)  | 69.54(16)  |
| I2 <sup>vi</sup> -I1-I2 <sup>vii</sup>   | 167.5(2)   | 155.8(2)   | 180        |
| I2 <sup>vi</sup> -I1-I2 <sup>viii</sup>  | 0          | 0          | 0          |
| I2 <sup>vi</sup> -I1-I3 <sup>iii</sup>   | 102.09(16) | 101.80(18) | 102.33(15) |
| I2 <sup>vi</sup> -I1-I3 <sup>v</sup>     | 95.29(14)  | 91.83(14)  | 102.89(12) |
| I2 <sup>vi</sup> -I1-I3 <sup>ix</sup>    | 102.09(16) | 101.80(18) | 102.33(15) |
| I2 <sup>vi</sup> -I1-I3 <sup>x</sup>     | 95.29(14)  | 91.83(14)  | 102.89(12) |
| I2 <sup>vii</sup> -I1-I2 <sup>viii</sup> | 167.5(2)   | 155.8(2)   | 180        |
| I2 <sup>vii</sup> -I1-I3 <sup>iii</sup>  | 75.05(15)  | 72.67(16)  | 76.11(14)  |
| I2 <sup>vii</sup> -I1-I3 <sup>v</sup>    | 66.88(13)  | 65.76(11)  | 69.54(16)  |
| I2 <sup>vii</sup> -I1-I3 <sup>ix</sup>   | 75.05(15)  | 72.67(16)  | 76.11(14)  |
| I2 <sup>vii</sup> -I1-I3 <sup>x</sup>    | 66.88(13)  | 65.76(11)  | 69.54(16)  |
| I2 <sup>viii</sup> -I1-I3 <sup>iii</sup> | 102.09(16) | 101.80(18) | 102.33(15) |
| I2 <sup>viii</sup> -I1-I3 <sup>v</sup>   | 95.29(14)  | 91.83(14)  | 102.89(12) |
| I2 <sup>viii</sup> -I1-I3 <sup>ix</sup>  | 102.09(16) | 101.80(18) | 102.33(15) |
| I2 <sup>viii</sup> -I1-I3 <sup>x</sup>   | 95.29(14)  | 91.83(14)  | 102.89(12) |
| I3 <sup>iii</sup> -I1-I3 <sup>ix</sup>   | 47.28(14)  | 44.9(2)    | 48.29(11)  |
| I3 <sup>v</sup> -I1-I3 <sup>x</sup>      | 44.80(13)  | 43.19(11)  | 46.3(2)    |
| I1 <sup>xi</sup> -I2-I1                  | 168.9(2)   | 157.3(3)   | 180        |
| I1 <sup>xi</sup> -I2-I2 <sup>iii</sup>   | 94.48(18)  | 77.86(17)  | 99.7(2)    |
| I1 <sup>xi</sup> -I2-I2 <sup>v</sup>     | 89.74(19)  | 82.2(2)    | 97.1(2)    |
| I1 <sup>xi</sup> -I2-I2 <sup>ix</sup>    | 94.48(18)  | 77.86(17)  | 99.7(2)    |
| I1 <sup>xi</sup> -I2-I2 <sup>vii</sup>   | 0          | 0          | 0          |
| I1 <sup>xi</sup> -I2-I2 <sup>x</sup>     | 89.74(19)  | 82.2(2)    | 97.1(2)    |
| I1 <sup>xi</sup> -I2-I3 <sup>v</sup>     | 105.61(14) | 104.61(18) | 106.13(11) |
| I1 <sup>xi</sup> -I2-I3 <sup>x</sup>     | 105.61(14) | 104.61(18) | 106.13(11) |
| I1-I2-I2 <sup>iii</sup>                  | 90.67(18)  | 82.37(19)  | 99.6(2)    |
| I1-I2-I2 <sup>v</sup>                    | 88.91(19)  | 76.01(17)  | 105.7(2)   |
| I1-I2-I2 <sup>ix</sup>                   | 90.67(18)  | 82.37(19)  | 99.6(2)    |
| I1-I2-I2 <sup>vii</sup>                  | 0          | 0          | 0          |
| I1-I2-I2 <sup>x</sup>                    | 88.91(19)  | 76.01(17)  | 105.7(2)   |
| I1-I2-I3 <sup>v</sup>                    | 73.38(13)  | 71.73(14)  | 74.28(12)  |
| I1-I2-I3 <sup>x</sup>                    | 73.38(13)  | 71.73(14)  | 74.28(12)  |
| I2 <sup>iii</sup> -I2-I2 <sup>v</sup>    | 175.9(2)   | 171.3(3)   | 179.53(17) |
| I2 <sup>iii</sup> -I2-I2 <sup>ix</sup>   | 0          | 0          | 0          |
| I2 <sup>iii</sup> -I2-I2 <sup>vii</sup>  | 0          | 0          | 0          |

|                                         |                |            |            |
|-----------------------------------------|----------------|------------|------------|
| I2 <sup>iii</sup> -I2-I2 <sup>x</sup>   | 175.9(2)       | 171.3(3)   | 179.53(17) |
| I2 <sup>iii</sup> -I2-I3 <sup>v</sup>   | 148.13(10)     | 147.38(11) | 149.85(12) |
| I2 <sup>iii</sup> -I2-I3 <sup>x</sup>   | 148.13(10)     | 147.38(11) | 149.85(12) |
| I2 <sup>v</sup> -I2-I2 <sup>ix</sup>    | 175.9(2)       | 171.3(3)   | 179.53(16) |
| I2 <sup>v</sup> -I2-I2 <sup>vii</sup>   | 0              | 0          | 0          |
| I2 <sup>v</sup> -I2-I2 <sup>x</sup>     | 0              | 0          | 0          |
| I2 <sup>ix</sup> -I2-I2 <sup>vii</sup>  | 0              | 0          | 0          |
| I2 <sup>ix</sup> -I2-I2 <sup>x</sup>    | 175.9(2)       | 171.3(3)   | 179.53(17) |
| I2 <sup>ix</sup> -I2-I3 <sup>v</sup>    | 148.13(10)     | 147.38(11) | 149.85(12) |
| I2 <sup>ix</sup> -I2-I3 <sup>x</sup>    | 148.13(10)     | 147.38(11) | 149.85(12) |
| I2 <sup>vii</sup> -I2-I2 <sup>x</sup>   | 0              | 0          | 0          |
| I2 <sup>vii</sup> -I2-I3 <sup>v</sup>   | 0              | 0          | 0          |
| I2 <sup>vii</sup> -I2-I3 <sup>x</sup>   | 0              | 0          | 0          |
| I3 <sup>v</sup> -I2-I3 <sup>x</sup>     | 46.79(13)      | 44.87(12)  | 47.60(14)  |
| Te3-I3-I1 <sup>iii</sup>                | 113.7(8)       | 112.1(4)   | 114.3(14)  |
| Te3-I3-I1 <sup>v</sup>                  | 114.6(8)       | 113.1(7)   | 115.4(4)   |
| Te3-I3-I2 <sup>iii</sup>                | 112.4(8)       | 110.8(4)   | 113.0(13)  |
| Te3-I3-I2 <sup>ix</sup>                 | 112.4(8)       | 110.8(4)   | 113.0(13)  |
| Te3-I3-I3 <sup>iii</sup>                | 87.8(5)        | 87.8(5)    | 87.8(5)    |
| Te3-I3-I3 <sup>v</sup>                  | 88.2(5)        | 88.2(5)    | 88.2(5)    |
| Te3-I3-I3 <sup>vii</sup>                | 176.6(8)       | 176.4(12)  | 176.9(5)   |
| I1 <sup>iii</sup> -I3-I1 <sup>v</sup>   | 119.6(2)       | 118.4(3)   | 120.96(17) |
| I1 <sup>iii</sup> -I3-I2 <sup>iii</sup> | 39.78(14)      | 38.23(17)  | 42.02(13)  |
| I1 <sup>iii</sup> -I3-I2 <sup>ix</sup>  | 39.78(14)      | 38.23(17)  | 42.02(13)  |
| I1 <sup>iii</sup> -I3-I3 <sup>v</sup>   | 152.4(2)       | 152.4(2)   | 152.4(2)   |
| I1 <sup>iii</sup> -I3-I3 <sup>vii</sup> | 67.62(17)      | 66.9(2)    | 68.42(15)  |
| I1 <sup>v</sup> -I3-I2 <sup>iii</sup>   | 132.7(2)       | 132.17(16) | 133.8(3)   |
| I1 <sup>v</sup> -I3-I2 <sup>ix</sup>    | 132.7(2)       | 132.17(16) | 133.8(3)   |
| I1 <sup>v</sup> -I3-I3 <sup>iii</sup>   | 146.8(4)       | 146.8(4)   | 146.8(4)   |
| I1 <sup>v</sup> -I3-I3 <sup>vii</sup>   | 66.38(17)      | 65.86(13)  | 67.6(3)    |
| I2 <sup>iii</sup> -I3-I2 <sup>ix</sup>  | 0              | 0          | 0          |
| I2 <sup>iii</sup> -I3-I3 <sup>v</sup>   | 144.9(2)       | 144.9(2)   | 144.9(2)   |
| I2 <sup>iii</sup> -I3-I3 <sup>vii</sup> | 66.62(16)      | 66.20(18)  | 67.60(15)  |
| I2 <sup>ix</sup> -I3-I3 <sup>v</sup>    | 144.9(2)       | 144.9(2)   | 144.9(2)   |
| I2 <sup>ix</sup> -I3-I3 <sup>vii</sup>  | 66.62(16)      | 66.20(18)  | 67.60(15)  |
| I3 <sup>iii</sup> -I3-I3 <sup>vii</sup> | 89.9(4)        | 89.9(4)    | 89.9(4)    |
| I3 <sup>v</sup> -I3-I3 <sup>vii</sup>   | 90.0(3)        | 90.0(3)    | 90.0(3)    |
| (i)                                     | -x+1,-y+1,-z   |            |            |
| (ii)                                    | -x+1,-y+1,-z+1 |            |            |
| (iii)                                   | x,y,z-1        |            |            |
| (iv)                                    | -x,-y+1,-z+1   |            |            |
| (v)                                     | x,y,z+1        |            |            |
| (vi)                                    | x+1,y,z        |            |            |
| (vii)                                   | x,-y+3/2,z     |            |            |
| (viii)                                  | x+1,-y+3/2,z   |            |            |
| (ix)                                    | x,-y+3/2,z-1   |            |            |
| (x)                                     | x,-y+3/2,z+1   |            |            |
| (xi)                                    | x-1,y,z        |            |            |

## Crystallographic details for commensurate WTe<sub>2</sub>I

Table S 11: Occupational waves for commensurate WTe<sub>2</sub>I.

| Atom | Wave/Parameter | Occ       |
|------|----------------|-----------|
| Te2  | delta          | 0.8318    |
|      | x40            | 0.3211(4) |
| Te3  | delta          | 0.1682    |
|      | x40            | 0.8231(4) |
| I1   | delta          | 0.8318    |
|      | x40            | 0.4567(5) |
| I2   | delta          | 0.8318    |
|      | x40            | 0.1933    |
| I3   | delta          | 0.1682    |
|      | x40            | 0.8366(5) |

Table S12: Positional parameters for commensurate WTe<sub>2</sub>I.

| Atom | Occ    | Wave | x            | y            | z           | Ueq/Uiso    |
|------|--------|------|--------------|--------------|-------------|-------------|
| W1   | 1      |      | 0.32164(6)   | 0.495299(18) | 0.2518(2)   | 0.00718(10) |
|      |        | s,1  | -0.00066(16) | 0.00147(4)   | -0.0298(10) |             |
|      |        | c,1  | 0.00256(13)  | -0.00162(3)  | -0.0094(4)  |             |
|      |        | s,2  | -0.00350(11) | 0.00013(3)   | -0.0044(6)  |             |
|      |        | c,2  | -0.00019(14) | 0.00012(4)   | 0.0026(4)   |             |
|      |        | s,3  | 0            | 0            | -0.0949(15) |             |
| Te1  | 1      |      | 0.57916(10)  | 0.59501(3)   | 0.2561(3)   | 0.00847(15) |
|      |        | s,1  | -0.0039(3)   | 0.00054(8)   | 0.0279(3)   |             |
|      |        | c,1  | -0.00876(16) | -0.00040(5)  | -0.0007(5)  |             |
|      |        | s,2  | -0.0009(2)   | -0.00033(5)  | 0.0108(3)   |             |
|      |        | c,2  | 0.00613(17)  | -0.00235(5)  | -0.0041(3)  |             |
|      |        |      | 0.4355       | 1            | 0           |             |
| Te2  | 0.8318 |      | 0.07018(16)  | 0.56910(4)   | 0.7592(4)   | 0.00718(18) |
|      |        | o,1  | -0.0008(2)   | 0.00093(6)   | -0.0008(6)  |             |
|      |        | o,2  | 0.0002(3)    | 0.00012(7)   | 0.0029(4)   |             |
|      |        | o,3  | 0.0011(4)    | -0.00061(11) | -0.0175(8)  |             |
|      |        | o,4  | -0.0007(3)   | 0.00003(8)   | -0.0030(7)  |             |
| Te3  | 0.1682 |      | 0.0811(4)    | 0.54884(10)  | 0.7465(8)   | 0.0077(4)   |
| I1   | 0.8318 |      | 0.3527(6)    | 0.75         | 0.7423(14)  | 0.0627(11)  |
|      |        | o,1  | 0.0010(9)    | 0            | 0.0720(8)   |             |
|      |        | o,2  | -0.0266(7)   | 0            | 0.0347(12)  |             |
|      |        | o,3  | -0.0065(7)   | 0            | -0.0358(10) |             |
|      |        | o,4  | 0.0058(11)   | 0            | -0.0214(14) |             |
| I2   | 0.8318 |      | -0.1823(6)   | 0.75         | 0.7503(15)  | 0.0660(12)  |
|      |        | o,1  | -0.0280(8)   | 0            | 0.0009(12)  |             |
|      |        | o,2  | -0.0161(8)   | 0            | 0.0755(9)   |             |
|      |        | o,3  | -0.0021(8)   | 0            | 0.0387(11)  |             |
|      |        | o,4  | 0.0110(11)   | 0            | 0.0226(18)  |             |
| I3   | 0.1682 |      | 0.1055(4)    | 0.67488(9)   | 0.7537(9)   | 0.0168(5)   |

Table S13: ADP harmonic parameters for commensurate  $WTe_2$ .

| Atom | Wave | U11         | U22         | U33         | U12          | U13         | U23         |
|------|------|-------------|-------------|-------------|--------------|-------------|-------------|
| W1   |      | 0.00523(16) | 0.01106(18) | 0.00526(17) | -0.00038(13) | 0.0000(4)   | 0.0020(2)   |
|      | s,1  | 0.0003(4)   | 0.0005(4)   | -0.0008(3)  | 0.0009(3)    | -0.0001(3)  | 0.0002(2)   |
|      | c,1  | 0.0002(3)   | 0.0000(3)   | 0.0004(3)   | 0.0002(3)    | -0.0004(3)  | 0.0005(3)   |
| Te1  |      | 0.0080(3)   | 0.0118(3)   | 0.0056(3)   | -0.0009(2)   | -0.0037(5)  | 0.0036(4)   |
| Te2  |      | 0.0053(3)   | 0.0125(3)   | 0.0037(4)   | -0.0006(2)   | 0.0026(5)   | 0.0027(4)   |
|      | o,1  | 0.0004(3)   | -0.0016(4)  | -0.0009(4)  | 0.0005(3)    | 0.0006(4)   | -0.0009(4)  |
|      | o,2  | 0.0007(5)   | -0.0007(5)  | 0.0002(5)   | 0.0006(4)    | 0.0001(2)   | -0.0001(3)  |
| Te3  |      | 0.0058(8)   | 0.0144(9)   | 0.0028(7)   | 0.0000(8)    | 0.0027(9)   | -0.0003(11) |
| I1   |      | 0.102(2)    | 0.0259(9)   | 0.060(2)    | 0            | 0.018(2)    | 0           |
|      | o,1  | 0.005(3)    | -0.0021(13) | 0.0039(18)  | 0            | -0.0057(15) | 0           |
|      | o,2  | -0.018(3)   | 0.0008(11)  | -0.0075(17) | 0            | 0.001(2)    | 0           |
| I2   |      | 0.106(3)    | 0.0257(9)   | 0.067(2)    | 0            | 0.009(2)    | 0           |
|      | o,1  | 0.031(3)    | -0.0012(12) | 0.018(2)    | 0            | -0.002(2)   | 0           |
|      | o,2  | 0.008(2)    | 0.0039(12)  | 0.0100(18)  | 0            | 0.0008(16)  | 0           |
| I3   |      | 0.0182(9)   | 0.0128(8)   | 0.0194(9)   | -0.0005(7)   | -0.0014(11) | -0.0004(10) |



Table S15: List of distances for commensurate WTe<sub>2</sub>l.

|                       | average / Å    | min / Å   | max / Å   |
|-----------------------|----------------|-----------|-----------|
| W1-W1 <sup>i</sup>    | 2.843(6)       | 2.825(7)  | 2.862(7)  |
| W1-W1 <sup>ii</sup>   | 2.859(6)       | 2.775(9)  | 3.080(9)  |
| W1-Te1                | 2.722(3)       | 2.689(3)  | 2.746(3)  |
| W1-Te1 <sup>i</sup>   | 2.715(5)       | 2.649(6)  | 2.794(6)  |
| W1-Te1 <sup>ii</sup>  | 2.696(5)       | 2.623(7)  | 2.761(7)  |
| W1-Te2 <sup>iii</sup> | 2.802(6)       | 2.744(8)  | 2.863(8)  |
| W1-Te2                | 2.837(5)       | 2.787(7)  | 2.905(7)  |
| W1-Te2 <sup>iv</sup>  | 2.839(4)       | 2.814(6)  | 2.860(6)  |
| W1-Te3 <sup>iii</sup> | 2.755(5)       | 2.755(5)  | 2.755(5)  |
| W1-Te3                | 2.766(7)       | 2.766(7)  | 2.766(7)  |
| W1-Te3 <sup>iv</sup>  | 2.739(3)       | 2.739(3)  | 2.739(3)  |
| Te3-I3                | 2.762(3)       | 2.762(3)  | 2.762(3)  |
| I1-I1 <sup>iii</sup>  | 3.416(11)      | 2.900(12) | 3.915(12) |
| I1-I1 <sup>v</sup>    | 3.416(11)      | 2.900(12) | 3.915(12) |
| I1-I2                 | 3.374(14)      | 2.966(18) | 4.015(18) |
| I1-I2 <sup>vi</sup>   | 3.143(14)      | 3.051(17) | 3.223(17) |
| I1-I3 <sup>v</sup>    | 4.164(8)       | 4.164(8)  | 4.164(8)  |
| I1-I3 <sup>viii</sup> | 4.164(8)       | 4.164(8)  | 4.164(8)  |
| I2-I2 <sup>iii</sup>  | 3.443(13)      | 2.967(16) | 4.002(16) |
| I2-I2 <sup>v</sup>    | 3.443(13)      | 2.967(16) | 4.002(16) |
| I2-I3 <sup>iii</sup>  | 4.148(11)      | 4.148(11) | 4.148(11) |
| I2-I3 <sup>viii</sup> | 4.148(11)      | 4.148(11) | 4.148(11) |
| I3-I3 <sup>ix</sup>   | 3.287(3)       | 3.287(3)  | 3.287(3)  |
| (i)                   | -x+1,-y+1,-z   |           |           |
| (ii)                  | -x+1,-y+1,-z+1 |           |           |
| (iii)                 | x,y,z-1        |           |           |
| (iv)                  | -x,-y+1,-z+1   |           |           |
| (v)                   | x,y,z+1        |           |           |
| (vi)                  | x+1,y,z        |           |           |
| (vii)                 | x,-y+3/2,z+1   |           |           |
| (viii)                | x,-y+3/2,z-1   |           |           |
| (ix)                  | x,-y+3/2,z     |           |           |
| (x)                   | x-1,y,z        |           |           |

Table S16: List of angles for commensurate WTe<sub>2</sub>l.

|                                         | average / ° | min / °    | max / °    |
|-----------------------------------------|-------------|------------|------------|
| W1 <sup>i</sup> -W1-W1 <sup>ii</sup>    | 74.97(16)   | 71.72(19)  | 82.50(17)  |
| W1 <sup>i</sup> -W1-Te1                 | 58.38(10)   | 57.09(11)  | 60.83(11)  |
| W1 <sup>i</sup> -W1-Te1 <sup>i</sup>    | 58.59(12)   | 57.18(14)  | 59.34(15)  |
| W1 <sup>i</sup> -W1-Te1 <sup>ii</sup>   | 104.87(11)  | 102.29(11) | 109.22(11) |
| W1 <sup>i</sup> -W1-Te2 <sup>iii</sup>  | 93.0(2)     | 91.9(2)    | 93.50(19)  |
| W1 <sup>i</sup> -W1-Te2                 | 140.47(16)  | 137.74(16) | 142.44(15) |
| W1 <sup>i</sup> -W1-Te2 <sup>iv</sup>   | 136.3(3)    | 133.8(3)   | 139.1(3)   |
| W1 <sup>i</sup> -W1-Te3 <sup>iii</sup>  | 87.1(2)     | 87.1(2)    | 87.1(2)    |
| W1 <sup>i</sup> -W1-Te3                 | 145.68(10)  | 145.68(10) | 145.68(10) |
| W1 <sup>i</sup> -W1-Te3 <sup>iv</sup>   | 138.87(18)  | 138.87(18) | 138.87(18) |
| W1 <sup>ii</sup> -W1-Te1                | 57.67(10)   | 56.70(12)  | 58.57(10)  |
| W1 <sup>ii</sup> -W1-Te1 <sup>i</sup>   | 105.25(11)  | 102.55(10) | 109.73(11) |
| W1 <sup>ii</sup> -W1-Te1 <sup>ii</sup>  | 58.63(12)   | 54.50(15)  | 61.06(13)  |
| W1 <sup>ii</sup> -W1-Te2 <sup>iii</sup> | 140.04(16)  | 138.02(16) | 142.81(15) |
| W1 <sup>ii</sup> -W1-Te2                | 92.9(2)     | 91.6(2)    | 94.6(2)    |
| W1 <sup>ii</sup> -W1-Te2 <sup>iv</sup>  | 136.6(3)    | 129.4(3)   | 141.9(3)   |
| W1 <sup>ii</sup> -W1-Te3 <sup>iii</sup> | 145.00(12)  | 145.00(12) | 145.00(12) |
| W1 <sup>ii</sup> -W1-Te3                | 82.1(2)     | 82.1(2)    | 82.1(2)    |

|                                          |            |            |            |
|------------------------------------------|------------|------------|------------|
| W1 <sup>ii</sup> -W1-Te3 <sup>iv</sup>   | 138.71(19) | 138.71(19) | 138.71(19) |
| Te1-W1-Te1 <sup>i</sup>                  | 116.87(16) | 114.04(17) | 119.9(2)   |
| Te1-W1-Te1 <sup>ii</sup>                 | 116.29(17) | 111.2(2)   | 119.63(17) |
| Te1-W1-Te2 <sup>iii</sup>                | 83.75(17)  | 81.88(17)  | 85.62(16)  |
| Te1-W1-Te2                               | 83.27(17)  | 81.75(17)  | 85.50(16)  |
| Te1-W1-Te2 <sup>iv</sup>                 | 155.39(17) | 153.53(17) | 157.29(16) |
| Te1-W1-Te3 <sup>iii</sup>                | 86.47(12)  | 86.47(12)  | 86.47(12)  |
| Te1-W1-Te3                               | 85.13(15)  | 85.13(15)  | 85.13(15)  |
| Te1-W1-Te3 <sup>iv</sup>                 | 150.85(9)  | 150.85(9)  | 150.85(9)  |
| Te1 <sup>i</sup> -W1-Te1 <sup>ii</sup>   | 79.83(9)   | 77.81(9)   | 83.73(9)   |
| Te1 <sup>i</sup> -W1-Te2 <sup>iii</sup>  | 100.4(2)   | 97.8(2)    | 103.4(3)   |
| Te1 <sup>i</sup> -W1-Te2                 | 158.47(17) | 157.59(17) | 159.61(17) |
| Te1 <sup>i</sup> -W1-Te2 <sup>iv</sup>   | 80.83(18)  | 78.93(18)  | 83.49(19)  |
| Te1 <sup>i</sup> -W1-Te3 <sup>iii</sup>  | 85.48(18)  | 85.48(18)  | 85.48(18)  |
| Te1 <sup>i</sup> -W1-Te3                 | 154.93(12) | 154.93(12) | 154.93(12) |
| Te1 <sup>i</sup> -W1-Te3 <sup>iv</sup>   | 85.84(11)  | 85.84(11)  | 85.84(11)  |
| Te1 <sup>ii</sup> -W1-Te2 <sup>iii</sup> | 158.18(18) | 156.56(16) | 160.50(18) |
| Te1 <sup>ii</sup> -W1-Te2                | 99.9(2)    | 96.6(2)    | 103.3(3)   |
| Te1 <sup>ii</sup> -W1-Te2 <sup>iv</sup>  | 81.40(18)  | 80.4(2)    | 83.30(18)  |
| Te1 <sup>ii</sup> -W1-Te3 <sup>iii</sup> | 153.84(12) | 153.84(12) | 153.84(12) |
| Te1 <sup>ii</sup> -W1-Te3                | 85.9(2)    | 85.9(2)    | 85.9(2)    |
| Te1 <sup>ii</sup> -W1-Te3 <sup>iv</sup>  | 84.74(10)  | 84.74(10)  | 84.74(10)  |
| Te2 <sup>iii</sup> -W1-Te2               | 75.03(19)  | 73.37(17)  | 77.4(2)    |
| Te2 <sup>iii</sup> -W1-Te2 <sup>iv</sup> | 78.28(18)  | 77.24(17)  | 79.01(17)  |
| Te2 <sup>iii</sup> -W1-Te3               | 78.46(15)  | 78.46(15)  | 78.46(15)  |
| Te2 <sup>iii</sup> -W1-Te3 <sup>iv</sup> | 71.84(13)  | 71.84(13)  | 71.84(13)  |
| Te2-W1-Te2 <sup>iv</sup>                 | 78.91(18)  | 77.6(2)    | 80.1(2)    |
| Te2-W1-Te3 <sup>iii</sup>                | 80.69(8)   | 80.69(8)   | 80.69(8)   |
| Te2-W1-Te3 <sup>iv</sup>                 | 71.95(13)  | 71.95(13)  | 71.95(13)  |
| Te2 <sup>iv</sup> -W1-Te3 <sup>iii</sup> | 71.85(15)  | 71.85(15)  | 71.85(15)  |
| Te2 <sup>iv</sup> -W1-Te3                | 72.28(16)  | 72.28(16)  | 72.28(16)  |
| W1-Te1-W1 <sup>i</sup>                   | 63.04(13)  | 62.00(16)  | 64.18(11)  |
| W1-Te1-W1 <sup>ii</sup>                  | 63.70(13)  | 61.85(13)  | 68.81(17)  |
| W1 <sup>i</sup> -Te1-W1 <sup>ii</sup>    | 79.82(17)  | 76.3(2)    | 89.14(18)  |
| W1-Te2-W1 <sup>v</sup>                   | 73.77(18)  | 71.83(16)  | 75.17(19)  |
| W1-Te2-W1 <sup>iv</sup>                  | 101.63(16) | 99.85(10)  | 103.8(2)   |
| W1 <sup>v</sup> -Te2-W1 <sup>iv</sup>    | 102.28(16) | 100.6(2)   | 104.6(2)   |
| W1-Te3-W1 <sup>v</sup>                   | 89.8(2)    | 89.8(2)    | 89.8(2)    |
| W1-Te3-W1 <sup>iv</sup>                  | 111.06(14) | 111.06(14) | 111.06(14) |
| W1-Te3-I3                                | 114.59(12) | 114.59(12) | 114.59(12) |
| W1 <sup>v</sup> -Te3-W1 <sup>iv</sup>    | 110.62(14) | 110.62(14) | 110.62(14) |
| W1 <sup>v</sup> -Te3-I3                  | 113.31(12) | 113.31(12) | 113.31(12) |
| W1 <sup>iv</sup> -Te3-I3                 | 114.85(10) | 114.85(10) | 114.85(10) |
| I1 <sup>iii</sup> -I1-I1 <sup>v</sup>    | 176.2(4)   | 170.9(4)   | 179.9(5)   |
| I1 <sup>iii</sup> -I1-I2                 | 90.7(4)    | 87.0(4)    | 96.3(4)    |
| I1 <sup>iii</sup> -I1-I2 <sup>vi</sup>   | 92.1(4)    | 83.7(4)    | 98.3(4)    |
| I1 <sup>iii</sup> -I1-I3 <sup>v</sup>    | 149.9(2)   | 149.9(2)   | 149.9(2)   |
| I1 <sup>iii</sup> -I1-I3 <sup>vii</sup>  | 149.9(2)   | 149.9(2)   | 149.9(2)   |
| I1 <sup>v</sup> -I1-I2                   | 89.7(4)    | 81.3(3)    | 98.6(4)    |
| I1 <sup>v</sup> -I1-I2 <sup>vi</sup>     | 91.9(4)    | 83.5(4)    | 96.2(4)    |
| I2-I1-I2 <sup>vi</sup>                   | 169.3(4)   | 165.3(5)   | 171.8(4)   |
| I2-I1-I3 <sup>v</sup>                    | 72.03(19)  | 72.03(19)  | 72.03(19)  |
| I2-I1-I3 <sup>vii</sup>                  | 72.03(19)  | 72.03(19)  | 72.03(19)  |
| I2 <sup>vi</sup> -I1-I3 <sup>v</sup>     | 100.5(2)   | 100.5(2)   | 100.5(2)   |
| I2 <sup>vi</sup> -I1-I3 <sup>vii</sup>   | 100.5(2)   | 100.5(2)   | 100.5(2)   |
| I3 <sup>v</sup> -I1-I3 <sup>vii</sup>    | 46.49(9)   | 46.49(9)   | 46.49(9)   |
| I1 <sup>x</sup> -I2-I1                   | 170.3(4)   | 166.8(3)   | 175.2(5)   |
| I1 <sup>x</sup> -I2-I2 <sup>iii</sup>    | 91.0(4)    | 82.6(3)    | 95.9(3)    |
| I1 <sup>x</sup> -I2-I2 <sup>v</sup>      | 91.7(4)    | 84.3(4)    | 95.7(4)    |
| I1 <sup>x</sup> -I2-I3 <sup>iii</sup>    | 105.3(3)   | 105.3(3)   | 105.3(3)   |
| I1 <sup>x</sup> -I2-I3 <sup>viii</sup>   | 105.3(3)   | 105.3(3)   | 105.3(3)   |
| I1-I2-I2 <sup>iii</sup>                  | 89.3(4)    | 80.4(4)    | 97.3(3)    |
| I1-I2-I2 <sup>v</sup>                    | 90.2(4)    | 86.9(4)    | 96.9(4)    |

|                                          |                |            |            |
|------------------------------------------|----------------|------------|------------|
| I1-I2-I3 <sup>iii</sup>                  | 70.3(3)        | 70.3(3)    | 70.3(3)    |
| I1-I2-I3 <sup>viii</sup>                 | 70.3(3)        | 70.3(3)    | 70.3(3)    |
| I2 <sup>iii</sup> -I2-I2 <sup>v</sup>    | 174.9(5)       | 168.3(6)   | 178.7(6)   |
| I2 <sup>v</sup> -I2-I3 <sup>iii</sup>    | 148.1(2)       | 148.1(2)   | 148.1(2)   |
| I2 <sup>v</sup> -I2-I3 <sup>viii</sup>   | 148.1(2)       | 148.1(2)   | 148.1(2)   |
| I3 <sup>iii</sup> -I2-I3 <sup>viii</sup> | 46.69(14)      | 46.69(14)  | 46.69(14)  |
| Te3-I3-I1 <sup>iii</sup>                 | 113.92(12)     | 113.92(12) | 113.92(12) |
| Te3-I3-I2 <sup>v</sup>                   | 112.40(13)     | 112.40(13) | 112.40(13) |
| Te3-I3-I3 <sup>ix</sup>                  | 176.75(11)     | 176.75(11) | 176.75(11) |
| I1 <sup>iii</sup> -I3-I2 <sup>v</sup>    | 133.28(11)     | 133.28(11) | 133.28(11) |
| I1 <sup>iii</sup> -I3-I3 <sup>ix</sup>   | 66.75(8)       | 66.75(8)   | 66.75(8)   |
| I2 <sup>v</sup> -I3-I3 <sup>ix</sup>     | 66.65(10)      | 66.65(10)  | 66.65(10)  |
| (i)                                      | -x+1,-y+1,-z   |            |            |
| (ii)                                     | -x+1,-y+1,-z+1 |            |            |
| (iii)                                    | x,y,z-1        |            |            |
| (iv)                                     | -x,-y+1,-z+1   |            |            |
| (v)                                      | x,y,z+1        |            |            |
| (vi)                                     | x+1,y,z        |            |            |
| (vii)                                    | x,-y+3/2,z+1   |            |            |
| (viii)                                   | x,-y+3/2,z-1   |            |            |
| (ix)                                     | x,-y+3/2,z     |            |            |
| (x)                                      | x-1,y,z        |            |            |

## Crystallographic details for $\text{WTe}_2\text{Br}_{0.5}$

Table S17: Fractional atomic coordinates and isotropic or equivalent isotropic displacement parameters ( $\text{\AA}^2$ ) for  $\text{WTe}_2\text{Br}_{0.5}$ .

|     | x             | y    | z            | Uiso*/Ueq   |
|-----|---------------|------|--------------|-------------|
| W1  | -0.00516 (15) | 0.25 | -0.1785 (3)  | 0.0527 (15) |
| Te1 | -0.07421 (12) | 0.25 | -0.5896 (5)  | 0.042 (2)   |
| Te2 | 0.12012 (14)  | 0.25 | 0.0912 (5)   | 0.039 (2)   |
| Br1 | -0.2500       | 0.25 | -0.6083 (13) | 0.115 (7)   |

Table S18: for  $\text{WTe}_2\text{Br}_{0.5}$ .

|     | $U^{11}$    | $U^{22}$    | $U^{33}$    | $U^{12}$ | $U^{13}$     | $U^{23}$ |
|-----|-------------|-------------|-------------|----------|--------------|----------|
| W1  | 0.0192 (14) | 0.0821 (16) | 0.0568 (14) | 0        | -0.0072 (17) | 0        |
| Te1 | 0.020 (3)   | 0.048 (3)   | 0.0574 (18) | 0        | 0.013 (2)    | 0        |
| Te2 | 0.047 (3)   | 0.044 (3)   | 0.0274 (17) | 0        | -0.010 (3)   | 0        |
| Br1 | 0.145 (9)   | 0.036 (5)   | 0.163 (7)   | 0        | 0            | 0        |

Table S19: Atomic displacement parameters ( $\text{\AA}^2$ ) for  $\text{WTe}_2\text{Br}_{0.5}$ .

|                         |            |                        |            |
|-------------------------|------------|------------------------|------------|
| W1—W1 <sup>i</sup>      | 3.6773 (1) | Te1—Te2 <sup>vi</sup>  | 3.735 (4)  |
| W1—W1 <sup>ii</sup>     | 3.6773 (1) | Te1—Te2 <sup>iii</sup> | 3.718 (4)  |
| W1—W1 <sup>iii</sup>    | 2.909 (2)  | Te1—Te2 <sup>vii</sup> | 3.735 (4)  |
| W1—W1 <sup>iv</sup>     | 2.909 (2)  | Te1—Te2 <sup>iv</sup>  | 3.718 (4)  |
| W1—Te1                  | 2.835 (4)  | Te1—Br1                | 2.946 (2)  |
| W1—Te1 <sup>v</sup>     | 3.884 (4)  | Te2—W1                 | 2.699 (4)  |
| W1—Te1 <sup>vi</sup>    | 2.698 (3)  | Te2—W1 <sup>iii</sup>  | 2.718 (3)  |
| W1—Te1 <sup>vii</sup>   | 2.698 (3)  | Te2—W1 <sup>iv</sup>   | 2.718 (3)  |
| W1—Te2                  | 2.699 (4)  | Te2—Te1 <sup>v</sup>   | 3.825 (4)  |
| W1—Te2 <sup>iii</sup>   | 2.718 (3)  | Te2—Te1 <sup>vi</sup>  | 3.735 (4)  |
| W1—Te2 <sup>iv</sup>    | 2.718 (3)  | Te2—Te1 <sup>iii</sup> | 3.718 (4)  |
| Te1—W1 <sup>viii</sup>  | 3.884 (4)  | Te2—Te1 <sup>vii</sup> | 3.735 (4)  |
| Te1—W1                  | 2.835 (4)  | Te2—Te1 <sup>iv</sup>  | 3.718 (4)  |
| Te1—W1 <sup>vi</sup>    | 2.698 (3)  | Te2—Te2 <sup>i</sup>   | 3.6773 (1) |
| Te1—W1 <sup>vii</sup>   | 2.698 (3)  | Te2—Te2 <sup>ii</sup>  | 3.6773 (1) |
| Te1—Te1 <sup>i</sup>    | 3.6773 (1) | Br1—Te1                | 2.946 (2)  |
| Te1—Te1 <sup>ii</sup>   | 3.6773 (1) | Br1—Te1 <sup>ix</sup>  | 2.946 (2)  |
| Te1—Te1 <sup>vi</sup>   | 3.291 (3)  | Br1—Br1 <sup>i</sup>   | 3.6773 (1) |
| Te1—Te1 <sup>vii</sup>  | 3.291 (3)  | Br1—Br1 <sup>ii</sup>  | 3.6773 (1) |
| Te1—Te2 <sup>viii</sup> | 3.825 (4)  |                        |            |

Symmetry codes: (i)  $x, y-1, z$ ; (ii)  $x, y+1, z$ ; (iii)  $-x, y-1/2, -z$ ; (iv)  $-x, y+1/2, -z$ ; (v)  $x, y, z+1$ ; (vi)  $-x, y-1/2, -z-1$ ; (vii)  $-x, y+1/2, -z-1$ ; (viii)  $x, y, z-1$ ; (ix)  $-x-1/2, -y+1/2, z$ . Table S20: for  $\text{WTe}_2\text{Br}_{0.5}$ .

|                                        |            |                                          |             |
|----------------------------------------|------------|------------------------------------------|-------------|
| W1 <sup>i</sup> —W1—W1 <sup>ii</sup>   | 180        | W1 <sup>vii</sup> —Te1—Br1               | 118.07 (13) |
| W1 <sup>i</sup> —W1—W1 <sup>iii</sup>  | 50.80 (6)  | Te1 <sup>i</sup> —Te1—Te1 <sup>ii</sup>  | 180         |
| W1 <sup>i</sup> —W1—W1 <sup>iv</sup>   | 129.20 (6) | Te1 <sup>i</sup> —Te1—Te1 <sup>vi</sup>  | 56.03 (7)   |
| W1 <sup>i</sup> —W1—Te1                | 90.00 (10) | Te1 <sup>i</sup> —Te1—Te1 <sup>vii</sup> | 123.97 (7)  |
| W1 <sup>i</sup> —W1—Te1 <sup>v</sup>   | 90.00 (8)  | Te1 <sup>i</sup> —Te1—                   | 90.00 (8)   |
| W1 <sup>i</sup> —W1—Te1 <sup>vi</sup>  | 47.04 (7)  | Te1 <sup>i</sup> —Te1—Te2 <sup>vi</sup>  | 60.51 (9)   |
| W1 <sup>i</sup> —W1—Te1 <sup>vii</sup> | 132.96 (7) | Te1 <sup>i</sup> —Te1—Te2 <sup>iii</sup> | 60.36 (9)   |
| W1 <sup>i</sup> —W1—Te2                | 90.00 (10) | Te1 <sup>i</sup> —Te1—Te2 <sup>vii</sup> | 119.49 (9)  |
| W1 <sup>i</sup> —W1—Te2 <sup>iii</sup> | 47.43 (7)  | Te1 <sup>i</sup> —Te1—Te2 <sup>iv</sup>  | 119.64 (9)  |
| W1 <sup>i</sup> —W1—Te2 <sup>iv</sup>  | 132.57 (7) | Te1 <sup>i</sup> —Te1—Br1                | 90.00 (5)   |
| W1 <sup>ii</sup> —W1—W1 <sup>iii</sup> | 129.20 (6) | Te1 <sup>ii</sup> —Te1—Te1 <sup>vi</sup> | 123.97 (7)  |

|                                            |             |                                               |             |
|--------------------------------------------|-------------|-----------------------------------------------|-------------|
| W1 <sup>ii</sup> —W1—W1 <sup>iv</sup>      | 50.80 (6)   | Te1 <sup>ii</sup> —Te1—                       | 56.03 (7)   |
| W1 <sup>ii</sup> —W1—Te1                   | 90.00 (10)  | $\bar{Te}1^{i\ddot{}}$ —Te1—                  | 90.00 (8)   |
| W1 <sup>ii</sup> —W1—Te1 <sup>v</sup>      | 90.00 (8)   | $\bar{Te}1^{i\ddot{}}$ —Te1—Te2 <sup>vi</sup> | 119.49 (9)  |
| W1 <sup>ii</sup> —W1—Te1 <sup>vi</sup>     | 132.96 (7)  | Te1 <sup>ii</sup> —Te1—Te2 <sup>iii</sup>     | 119.64 (9)  |
| W1 <sup>ii</sup> —W1—Te1 <sup>vii</sup>    | 47.04 (7)   | Te1 <sup>ii</sup> —Te1—                       | 60.51 (9)   |
| W1 <sup>ii</sup> —W1—Te2                   | 90.00 (10)  | $\bar{Te}1^{i\ddot{}}$ —Te1—Te2 <sup>iv</sup> | 60.36 (9)   |
| W1 <sup>ii</sup> —W1—Te2 <sup>iii</sup>    | 132.57 (7)  | Te1 <sup>ii</sup> —Te1—Br1                    | 90.00 (5)   |
| W1 <sup>ii</sup> —W1—Te2 <sup>iv</sup>     | 47.43 (7)   | Te1 <sup>vi</sup> —Te1—                       | 67.93 (7)   |
| W1 <sup>iii</sup> —W1—W1 <sup>iv</sup>     | 78.40 (6)   | $\bar{Te}1^{i\ddot{}}$ —Te1—                  | 62.46 (10)  |
| W1 <sup>iii</sup> —W1—Te1                  | 136.86 (16) | $\bar{Te}1^{i\ddot{}}$ —Te1—                  | 99.81 (13)  |
| W1 <sup>iii</sup> —W1—Te1 <sup>vi</sup>    | 87.61 (13)  | $\bar{Te}1^{i\ddot{}}$ —Te1—                  | 65.82 (10)  |
| W1 <sup>iii</sup> —W1—Te1 <sup>vii</sup>   | 145.05 (13) | $\bar{Te}1^{i\ddot{}}$ —Te1—                  | 136.09 (13) |
| W1 <sup>iii</sup> —W1—Te2                  | 57.84 (10)  | $\bar{Te}1^{i\ddot{}}$ —Te1—                  | 98.22 (10)  |
| W1 <sup>iii</sup> —W1—Te2 <sup>iii</sup>   | 57.20 (10)  | $\bar{Te}1^{i\ddot{}}$ —Te1—Br1               | 140.20 (11) |
| W1 <sup>iii</sup> —W1—Te2 <sup>iv</sup>    | 108.26 (10) | Te1 <sup>vii</sup> —Te1—                      | 62.46 (10)  |
| W1 <sup>iv</sup> —W1—Te1                   | 136.86 (16) | $\bar{Te}1^{i\ddot{}}$ —Te1—                  | 136.09 (13) |
| W1 <sup>iv</sup> —W1—Te1 <sup>vi</sup>     | 145.05 (13) | $\bar{Te}1^{i\ddot{}}$ —Te1—                  | 98.22 (10)  |
| W1 <sup>iv</sup> —W1—Te1 <sup>vii</sup>    | 87.61 (13)  | $\bar{Te}1^{i\ddot{}}$ —Te1—                  | 99.81 (13)  |
| W1 <sup>iv</sup> —W1—Te2                   | 57.84 (10)  | $\bar{Te}1^{i\ddot{}}$ —Te1—                  | 65.82 (10)  |
| W1 <sup>iv</sup> —W1—Te2 <sup>iii</sup>    | 108.26 (10) | $\bar{Te}1^{i\ddot{}}$ —Te1—Br1               | 140.20 (11) |
| W1 <sup>iv</sup> —W1—Te2 <sup>iv</sup>     | 57.20 (10)  | Te2 <sup>viii</sup> —Te1—                     | 74.38 (10)  |
| Te1—W1—Te1 <sup>v</sup>                    | 138.61 (18) | $\bar{Te}2^{viii}$ —Te1—                      | 128.28 (14) |
| Te1—W1—Te1 <sup>vi</sup>                   | 72.95 (12)  | $\bar{Te}2^{viii}$ —Te1—                      | 74.38 (10)  |
| Te1—W1—Te1 <sup>vii</sup>                  | 72.95 (12)  | $\bar{Te}2^{viii}$ —Te1—                      | 128.28 (14) |
| Te1—W1—Te2                                 | 153.1 (2)   | $\bar{Te}2^{viii}$ —Te1—Br1                   | 146.01 (13) |
| Te1—W1—Te2 <sup>iii</sup>                  | 84.02 (14)  | Te2 <sup>vi</sup> —Te1—                       | 115.33 (15) |
| Te1—W1—Te2 <sup>iv</sup>                   | 84.02 (14)  | $\bar{Te}2^{vi}$ —Te1—                        | 58.99 (9)   |
| Te1 <sup>v</sup> —W1—Te1 <sup>vi</sup>     | 131.55 (16) | $\bar{Te}2^{vi}$ —Te1—                        | 156.19 (15) |
| Te1 <sup>v</sup> —W1—Te1 <sup>vii</sup>    | 131.55 (16) | $\bar{Te}2^{vi}$ —Te1—Br1                     | 76.14 (16)  |
| Te1 <sup>v</sup> —W1—Te2                   | 68.33 (12)  | Te2 <sup>iii</sup> —Te1—                      | 156.19 (15) |
| Te1 <sup>v</sup> —W1—Te2 <sup>iii</sup>    | 66.18 (11)  | $\bar{Te}2^{iii}$ —Te1—                       | 59.28 (9)   |
| Te1 <sup>v</sup> —W1—Te2 <sup>iv</sup>     | 66.18 (11)  | $\bar{Te}2^{iii}$ —Te1—Br1                    | 80.04 (17)  |
| Te1 <sup>vi</sup> —W1—                     | 85.92 (8)   | Te2 <sup>vii</sup> —Te1—                      | 115.33 (15) |
| $\bar{Te}1^{vi\ddot{}}$ —W1—Te2            | 87.57 (15)  | $\bar{Te}2^{vii}$ —Te1—Br1                    | 76.14 (16)  |
| Te1 <sup>vi</sup> —W1—Te2 <sup>iii</sup>   | 89.85 (13)  | Te2 <sup>iv</sup> —Te1—Br1                    | 80.04 (17)  |
| Te1 <sup>vi</sup> —W1—Te2 <sup>iv</sup>    | 156.82 (13) | W1—Te2—W1 <sup>iii</sup>                      | 64.96 (11)  |
| Te1 <sup>vii</sup> —W1—Te2                 | 87.57 (15)  | W1—Te2—W1 <sup>iv</sup>                       | 64.96 (11)  |
| Te1 <sup>vii</sup> —W1—Te2 <sup>iii</sup>  | 156.82 (13) | W1—Te2—Te1 <sup>v</sup>                       | 70.69 (12)  |
| Te1 <sup>vii</sup> —W1—                    | 89.85 (13)  | W1—Te2—Te1 <sup>vi</sup>                      | 46.20 (11)  |
| $\bar{Te}2^{\cdot}$ —W1—Te2 <sup>iii</sup> | 115.04 (15) | W1—Te2—Te1 <sup>iii</sup>                     | 111.74 (15) |
| Te2—W1—Te2 <sup>iv</sup>                   | 115.04 (15) | W1—Te2—Te1 <sup>vii</sup>                     | 46.20 (11)  |
| Te2 <sup>iii</sup> —W1—Te2 <sup>iv</sup>   | 85.13 (8)   | W1—Te2—Te1 <sup>iv</sup>                      | 111.74 (15) |
| W1 <sup>viii</sup> —Te1—W1                 | 138.61 (13) | W1—Te2—Te2 <sup>i</sup>                       | 90.00 (10)  |
| W1 <sup>viii</sup> —Te1—W1 <sup>vi</sup>   | 48.45 (9)   | W1—Te2—Te2 <sup>ii</sup>                      | 90.00 (10)  |
| W1 <sup>viii</sup> —Te1—                   | 48.45 (9)   | W1 <sup>iii</sup> —Te2—W1 <sup>iv</sup>       | 85.13 (8)   |
| $\bar{W}1^{viii}$ —Te1—Te1 <sup>i</sup>    | 90.00 (8)   | W1 <sup>iii</sup> —Te2—Te1 <sup>vi</sup>      | 72.07 (12)  |
| W1 <sup>viii</sup> —Te1—Te1 <sup>ii</sup>  | 90.00 (8)   | W1 <sup>iii</sup> —Te2—Te1 <sup>iii</sup>     | 49.33 (10)  |
| W1 <sup>viii</sup> —Te1—                   | 95.88 (11)  | W1 <sup>iii</sup> —Te2—Te1 <sup>vii</sup>     | 110.99 (12) |
| $\bar{W}1^{viii}$ —Te1—                    | 95.88 (11)  | W1 <sup>iii</sup> —Te2—Te1 <sup>iv</sup>      | 91.00 (10)  |
| $\bar{W}1^{viii}$ —Te1—                    | 150.16 (13) | W1 <sup>iii</sup> —Te2—Te2 <sup>i</sup>       | 47.43 (7)   |
| $\bar{W}1^{viii}$ —Te1—                    | 150.16 (13) | W1 <sup>iii</sup> —Te2—Te2 <sup>ii</sup>      | 132.57 (7)  |
| $\bar{W}1^{viii}$ —Te1—Br1                 | 105.03 (18) | W1 <sup>iv</sup> —Te2—Te1 <sup>vi</sup>       | 110.99 (12) |
| W1—Te1—W1 <sup>vi</sup>                    | 107.05 (13) | W1 <sup>iv</sup> —Te2—Te1 <sup>iii</sup>      | 91.00 (10)  |
| W1—Te1—W1 <sup>vii</sup>                   | 107.05 (13) | W1 <sup>iv</sup> —Te2—                        | 72.07 (12)  |
| W1—Te1—Te1 <sup>i</sup>                    | 90.00 (10)  | $\bar{W}1^{iv\ddot{}}$ —Te2—Te1 <sup>iv</sup> | 49.33 (10)  |
| W1—Te1—Te1 <sup>ii</sup>                   | 90.00 (10)  | W1 <sup>iv</sup> —Te2—Te2 <sup>i</sup>        | 132.57 (7)  |
| W1—Te1—Te1 <sup>vi</sup>                   | 51.61 (10)  | W1 <sup>iv</sup> —Te2—Te2 <sup>ii</sup>       | 47.43 (7)   |
| W1—Te1—Te1 <sup>vii</sup>                  | 51.61 (10)  | Te1 <sup>v</sup> —Te2—Te1 <sup>vi</sup>       | 105.62 (13) |
| W1—Te1—Te2 <sup>viii</sup>                 | 97.63 (14)  | Te1 <sup>v</sup> —Te2—Te1 <sup>iii</sup>      | 51.72 (9)   |
| W1—Te1—Te2 <sup>vi</sup>                   | 148.89 (16) | Te1 <sup>v</sup> —Te2—                        | 105.62 (13) |
| W1—Te1—Te2 <sup>vii</sup>                  | 46.65 (10)  | $\bar{Te}1^{v\ddot{}}$ —Te2—Te1 <sup>iv</sup> | 51.72 (9)   |
| W1—Te1—Te2 <sup>viii</sup>                 | 148.89 (16) | Te1 <sup>v</sup> —Te2—Te2 <sup>i</sup>        | 90.00 (8)   |
| W1—Te1—Te2 <sup>iv</sup>                   | 46.65 (10)  | Te1 <sup>v</sup> —Te2—Te2 <sup>ii</sup>       | 90.00 (8)   |

|                                                        |             |                                                       |             |
|--------------------------------------------------------|-------------|-------------------------------------------------------|-------------|
| W1—Te1—Br1                                             | 116.36 (19) | Te1 <sup>vi</sup> —Te2—                               | 115.33 (15) |
| W1 <sup>vi</sup> —Te1—W1 <sup>vii</sup>                | 85.92 (8)   | $\bar{\text{Te}}1^{\text{vi}}$ —Te2—                  | 58.99 (9)   |
| W1 <sup>vi</sup> —Te1—Te1 <sup>i</sup>                 | 47.04 (7)   | $\bar{\text{Te}}1^{\text{vi}}$ —Te2—                  | 156.19 (15) |
| W1 <sup>vi</sup> —Te1—Te1 <sup>ii</sup>                | 132.96 (7)  | $\bar{\text{Te}}1^{\text{vi}}$ —Te2—Te2 <sup>i</sup>  | 60.51 (9)   |
| W1 <sup>vi</sup> —Te1—Te1 <sup>vi</sup>                | 55.45 (10)  | Te1 <sup>vi</sup> —Te2—Te2 <sup>ii</sup>              | 119.49 (9)  |
| W1 <sup>vi</sup> —Te1—                                 | 101.20 (10) | Te1 <sup>iii</sup> —Te2—                              | 156.19 (15) |
| $\bar{\text{W}}1^{\text{vi}}$ —Te1—                    | 45.29 (9)   | $\bar{\text{Te}}1^{\text{iii}}$ —Te2—                 | 59.28 (9)   |
| $\bar{\text{W}}1^{\text{vi}}$ —Te1—Te2 <sup>vi</sup>   | 46.22 (10)  | $\bar{\text{Te}}1^{\text{iii}}$ —Te2—Te2 <sup>i</sup> | 60.36 (9)   |
| W1 <sup>vi</sup> —Te1—Te2 <sup>iii</sup>               | 102.81 (14) | Te1 <sup>iii</sup> —Te2—Te2 <sup>ii</sup>             | 119.64 (9)  |
| W1 <sup>vi</sup> —Te1—                                 | 88.81 (10)  | Te1 <sup>vii</sup> —Te2—                              | 115.33 (15) |
| $\bar{\text{W}}1^{\text{vi}}$ —Te1—Te2 <sup>iv</sup>   | 153.61 (14) | $\bar{\text{Te}}1^{\text{vii}}$ —Te2—Te2 <sup>i</sup> | 119.49 (9)  |
| W1 <sup>vi</sup> —Te1—Br1                              | 118.07 (13) | Te1 <sup>vii</sup> —Te2—                              | 60.51 (9)   |
| W1 <sup>vii</sup> —Te1—Te1 <sup>i</sup>                | 132.96 (7)  | $\bar{\text{Te}}1^{\text{iv}}$ —Te2—Te2 <sup>i</sup>  | 119.64 (9)  |
| W1 <sup>vii</sup> —Te1—Te1 <sup>ii</sup>               | 47.04 (7)   | Te1 <sup>iv</sup> —Te2—Te2 <sup>ii</sup>              | 60.36 (9)   |
| W1 <sup>vii</sup> —Te1—                                | 101.20 (10) | Te2 <sup>i</sup> —Te2—Te2 <sup>ii</sup>               | 180         |
| $\bar{\text{W}}1^{\text{vii}}$ —Te1—                   | 55.45 (10)  | Te1—Br1—Te1 <sup>ix</sup>                             | 175.42 (13) |
| $\bar{\text{W}}1^{\text{vii}}$ —Te1—                   | 45.29 (9)   | Te1—Br1—Br1 <sup>i</sup>                              | 90.00 (5)   |
| $\bar{\text{W}}1^{\text{vii}}$ —Te1—                   | 88.81 (10)  | Te1—Br1—Br1 <sup>ii</sup>                             | 90.00 (5)   |
| $\bar{\text{W}}1^{\text{vii}}$ —Te1—Te2 <sup>iii</sup> | 153.61 (14) | Te1 <sup>ix</sup> —Br1—Br1 <sup>i</sup>               | 90.00 (5)   |
| W1 <sup>vii</sup> —Te1—                                | 46.22 (10)  | Te1 <sup>ix</sup> —Br1—Br1 <sup>ii</sup>              | 90.00 (5)   |
| $\bar{\text{W}}1^{\text{vii}}$ —Te1—                   | 102.81 (14) | Br1 <sup>i</sup> —Br1—Br1 <sup>ii</sup>               | 180         |

Symmetry codes: (i)  $x, y-1, z$ ; (ii)  $x, y+1, z$ ; (iii)  $-x, y-1/2, -z$ ; (iv)  $-x, y+1/2, -z$ ; (v)  $x, y, z+1$ ; (vi)  $-x, y-1/2, -z-1$ ; (vii)  $-x, y+1/2, -z-1$ ; (viii)  $x, y, z-1$ ; (ix)  $-x-1/2, -y+1/2, z$ .

## Crystallographic details for $\text{WTe}_2\text{Br}_{1.25}$

Table S 21: Fractional Atomic Coordinates ( $\times 10^4$ ) and Equivalent Isotropic Displacement Parameters ( $\text{\AA}^2 \times 10^3$ ) for  $\text{WTe}_2\text{Br}_{1.25}$ .  $U_{eq}$  is defined as 1/3 of the trace of the orthogonalised  $U_j$ .

| Atom | x        | y          | z         | $U_{eq}$ |
|------|----------|------------|-----------|----------|
| W4   | 5000     | 3794(2)    | 723(8)    | 55(2)    |
| W8   | 5000     | 3803(2)    | 5768(8)   | 57(2)    |
| W6   | 1607(5)  | 3809.8(15) | 5719(5)   | 56(2)    |
| W3   | 3417(5)  | 3849.9(16) | 2475(5)   | 58(2)    |
| W2   | 1886(4)  | 3782.2(15) | 703(5)    | 57(2)    |
| W5   | 0        | 3832(2)    | 7490(7)   | 55(2)    |
| W7   | 3155(5)  | 3850.8(15) | 7480(5)   | 58(2)    |
| W1   | 0        | 3858(2)    | 2403(8)   | 64(3)    |
| Te1  | 0        | 3357(3)    | 1159(9)   | 53(3)    |
| Te3  | 3411(6)  | 3323(2)    | 1265(6)   | 52(2)    |
| Te13 | 0        | 4055(3)    | 9515(10)  | 55(3)    |
| Te12 | 5000     | 3538(3)    | 3811(9)   | 57(3)    |
| Te15 | 3329(6)  | 4157(2)    | -525(7)   | 55(2)    |
| Te14 | 1712(6)  | 3461(2)    | 8708(7)   | 61(3)    |
| Te10 | 1651(6)  | 3557(2)    | 3727(7)   | 60(3)    |
| Te8  | 5000     | 4294(3)    | 7073(10)  | 55(3)    |
| Te6  | 1594(7)  | 4313.7(17) | 7032(7)   | 52(2)    |
| Te16 | 5000     | 3555(3)    | 8679(10)  | 60(3)    |
| Te9  | 0        | 4186(3)    | 4440(11)  | 57(3)    |
| Te11 | 3342(6)  | 4177.7(19) | 4490(7)   | 55(2)    |
| Te5  | 0        | 3347(3)    | 6167(10)  | 59(3)    |
| Te7  | 3283(7)  | 3357(2)    | 6187(7)   | 58(2)    |
| Te4  | 5000     | 4313(3)    | 1945(12)  | 63(3)    |
| Te2  | 1726(7)  | 4291(3)    | 1916(8)   | 71(3)    |
| Br5  | 5000     | 2961(5)    | 3756(16)  | 63(5)    |
| Br6  | 5000     | 2969(5)    | 8534(18)  | 64(5)    |
| Br3  | 1794(15) | 2597(4)    | 6973(16)  | 78(4)    |
| Br4  | 1674(12) | 2984(4)    | 3571(14)  | 71(4)    |
| Br7  | 0        | 4636(6)    | 9607(19)  | 71(6)    |
| Br8  | 3170(20) | 5000       | 10520(20) | 74(6)    |
| Br1  | 5000     | 2249(6)    | 3950(20)  | 74(6)    |
| Br9  | 3160(20) | 5000       | 8530(20)  | 75(6)    |
| Br10 | 0        | 5000       | 5910(60)  | 190(40)  |
| Br2  | 3175(12) | 2438(5)    | 5615(18)  | 86(5)    |
| Br12 | 2920(40) | 5000       | 6020(80)  | 290(50)  |
| Br13 | 3020(60) | 5000       | 2760(100) | 350(80)  |
| Br11 | 0        | 5000       | 3080(70)  | 240(60)  |

Table S22: Anisotropic Displacement Parameters ( $\times 10^4$ ) for  $\text{WTe}_2\text{Br}_{1.25}$ . The anisotropic displacement factor exponent takes the form:  $-2\pi^2[h^2a^{*2} \times U_{11} + \dots + 2hka^* \times b^* \times U_{12}]$

| Atom | $U_{11}$ | $U_{22}$ | $U_{33}$ | $U_{23}$ | $U_{13}$ | $U_{12}$ |
|------|----------|----------|----------|----------|----------|----------|
| W4   | 31(3)    | 80(5)    | 55(5)    | 7(4)     | 0        | 0        |
| W8   | 37(4)    | 79(5)    | 53(5)    | -3(4)    | 0        | 0        |
| W6   | 34(3)    | 77(4)    | 55(4)    | -5(3)    | 1(3)     | -1(2)    |
| W3   | 32(3)    | 91(4)    | 51(3)    | 0(3)     | -1(3)    | 0(2)     |
| W2   | 31(3)    | 81(4)    | 60(4)    | 5(3)     | -1(3)    | 0(2)     |
| W5   | 35(4)    | 76(5)    | 55(5)    | 0(4)     | 0        | 0        |
| W7   | 42(3)    | 80(4)    | 52(4)    | 1(3)     | -2(3)    | 0(2)     |
| W1   | 69(6)    | 70(5)    | 55(6)    | 1(4)     | 0        | 0        |
| Te1  | 26(4)    | 76(7)    | 55(7)    | -5(5)    | 0        | 0        |
| Te3  | 31(3)    | 81(5)    | 45(4)    | -2(3)    | 1(3)     | -1(3)    |
| Te13 | 23(4)    | 95(8)    | 49(6)    | 4(6)     | 0        | 0        |
| Te12 | 24(4)    | 109(9)   | 37(6)    | -5(6)    | 0        | 0        |
| Te15 | 33(3)    | 85(5)    | 46(4)    | 0(4)     | 1(3)     | 2(3)     |
| Te14 | 28(3)    | 104(6)   | 49(5)    | -4(5)    | 2(3)     | -1(3)    |
| Te10 | 25(3)    | 100(6)   | 55(5)    | -7(4)    | 1(3)     | -2(3)    |
| Te8  | 35(5)    | 73(7)    | 57(7)    | -3(5)    | 0        | 0        |
| Te6  | 43(4)    | 55(4)    | 59(5)    | -5(3)    | -2(4)    | -1(3)    |
| Te16 | 33(5)    | 93(8)    | 56(7)    | -1(6)    | 0        | 0        |
| Te9  | 36(5)    | 77(7)    | 58(7)    | 0(6)     | 0        | 0        |
| Te11 | 32(3)    | 76(5)    | 57(4)    | -2(4)    | 0(3)     | 0(3)     |
| Te5  | 29(5)    | 95(9)    | 52(7)    | -1(6)    | 0        | 0        |
| Te7  | 31(3)    | 84(5)    | 58(5)    | 4(4)     | 1(3)     | 0(3)     |
| Te4  | 24(4)    | 91(8)    | 74(8)    | 5(7)     | 0        | 0        |
| Te2  | 20(3)    | 126(8)   | 66(6)    | -2(5)    | -4(3)    | 3(4)     |
| Br5  | 20(6)    | 118(15)  | 51(11)   | 3(10)    | 0        | 0        |
| Br6  | 60(10)   | 65(11)   | 67(13)   | -8(9)    | 0        | 0        |
| Br3  | 57(8)    | 84(9)    | 92(11)   | -2(8)    | 21(8)    | 4(7)     |
| Br4  | 41(6)    | 87(9)    | 86(11)   | 8(8)     | 1(7)     | 1(6)     |
| Br7  | 29(7)    | 124(18)  | 58(12)   | -3(11)   | 0        | 0        |
| Br8  | 64(11)   | 65(11)   | 94(16)   | 0        | 10(12)   | 0        |
| Br1  | 41(9)    | 102(15)  | 78(14)   | 0(12)    | 0        | 0        |
| Br9  | 54(10)   | 92(14)   | 79(15)   | 0        | 13(10)   | 0        |
| Br10 | 370(130) | 60(20)   | 150(60)  | 0        | 0        | 0        |
| Br2  | 36(6)    | 118(13)  | 104(13)  | 27(11)   | 9(8)     | 2(6)     |
| Br12 | 60(20)   | 450(130) | 370(110) | 0        | 110(40)  | 0        |
| Br13 | 190(50)  | 64(18)   | 800(200) | 0        | -300(90) | 0        |
| Br11 | 500(200) | 50(20)   | 170(70)  | 0        | 0        | 0        |

Table S23: Bond Lengths in Å for **WTe<sub>2</sub>Br<sub>1.25</sub>**.

| Atom | Atom              | Length/Å  | Atom | Atom              | Length/Å  |
|------|-------------------|-----------|------|-------------------|-----------|
| W4   | W3                | 2.789(9)  | W2   | Te3               | 2.653(10) |
| W4   | W3 <sup>1</sup>   | 2.789(9)  | W2   | Te13 <sup>2</sup> | 2.763(11) |
| W4   | Te3               | 2.725(11) | W2   | Te15              | 2.713(10) |
| W4   | Te3 <sup>1</sup>  | 2.725(11) | W2   | Te14 <sup>2</sup> | 2.879(12) |
| W4   | Te15              | 2.843(11) | W2   | Te2               | 2.676(13) |
| W4   | Te15 <sup>1</sup> | 2.843(11) | W5   | Te13              | 2.731(16) |
| W4   | Te16 <sup>2</sup> | 2.778(16) | W5   | Te14 <sup>3</sup> | 2.866(11) |
| W4   | Te4               | 2.716(17) | W5   | Te14              | 2.866(11) |
| W8   | W7 <sup>1</sup>   | 2.925(9)  | W5   | Te6               | 2.738(10) |
| W8   | W7                | 2.925(9)  | W5   | Te6 <sup>3</sup>  | 2.738(10) |
| W8   | Te12              | 2.723(15) | W5   | Te5               | 2.672(16) |
| W8   | Te8               | 2.680(15) | W7   | Te15 <sup>4</sup> | 2.849(11) |
| W8   | Te11              | 2.883(11) | W7   | Te14              | 2.750(11) |
| W8   | Te11 <sup>1</sup> | 2.883(11) | W7   | Te8               | 2.782(11) |
| W8   | Te7               | 2.701(11) | W7   | Te6               | 2.653(10) |
| W8   | Te7 <sup>1</sup>  | 2.701(11) | W7   | Te16              | 2.783(11) |
| W6   | W5                | 2.815(9)  | W7   | Te7               | 2.685(12) |
| W6   | W7                | 2.772(9)  | W1   | Te1               | 2.668(15) |
| W6   | Te10              | 2.741(11) | W1   | Te10              | 2.748(12) |
| W6   | Te6               | 2.730(10) | W1   | Te10 <sup>3</sup> | 2.748(12) |
| W6   | Te9               | 2.852(12) | W1   | Te9               | 2.933(17) |
| W6   | Te11              | 2.883(11) | W1   | Te2 <sup>3</sup>  | 2.685(12) |
| W6   | Te5               | 2.682(13) | W1   | Te2               | 2.685(12) |
| W6   | Te7               | 2.706(10) | Te13 | Br7               | 2.50(3)   |
| W3   | W2                | 2.781(8)  | Te12 | Br5               | 2.48(3)   |
| W3   | Te3               | 2.736(11) | Te10 | Br4               | 2.473(19) |
| W3   | Te12              | 2.735(12) | Te16 | Br6               | 2.53(2)   |
| W3   | Te10              | 2.758(10) | Br3  | Br2               | 2.36(2)   |
| W3   | Te11              | 2.910(11) | Br8  | Br9               | 2.51(3)   |
| W3   | Te4               | 2.692(13) |      |                   |           |
| W3   | Te2               | 2.706(12) |      |                   |           |
| W2   | W1                | 2.955(9)  |      |                   |           |
| W2   | Te1               | 2.775(11) |      |                   |           |

<sup>1</sup>1-x,+y,+z; <sup>2</sup>+x,+y,-1+z; <sup>3</sup>-x,+y,+z; <sup>4</sup>+x,+y,1+z

Table S 24: Bond Angles in ° for **WTe<sub>2</sub>Br<sub>1.25</sub>**.

| Atom              | Atom | Atom              | Angle/°  | Atom              | Atom | Atom              | Angle/°  |
|-------------------|------|-------------------|----------|-------------------|------|-------------------|----------|
| W3 <sup>1</sup>   | W4   | W3                | 74.2(3)  | Te16 <sup>2</sup> | W4   | Te15              | 71.8(4)  |
| W3 <sup>1</sup>   | W4   | Te15              | 140.2(4) | Te16 <sup>2</sup> | W4   | Te15 <sup>1</sup> | 71.8(4)  |
| W3                | W4   | Te15 <sup>1</sup> | 140.2(4) | Te4               | W4   | W3                | 58.5(3)  |
| W3 <sup>1</sup>   | W4   | Te15 <sup>1</sup> | 90.9(2)  | Te4               | W4   | W3 <sup>1</sup>   | 58.5(3)  |
| W3                | W4   | Te15              | 90.9(2)  | Te4               | W4   | Te3 <sup>1</sup>  | 118.0(4) |
| Te3 <sup>1</sup>  | W4   | W3 <sup>1</sup>   | 59.5(2)  | Te4               | W4   | Te3               | 118.0(4) |
| Te3               | W4   | W3                | 59.5(2)  | Te4               | W4   | Te15              | 82.1(4)  |
| Te3               | W4   | W3 <sup>1</sup>   | 103.8(4) | Te4               | W4   | Te15 <sup>1</sup> | 82.1(4)  |
| Te3 <sup>1</sup>  | W4   | W3                | 103.8(4) | Te4               | W4   | Te16 <sup>2</sup> | 146.3(6) |
| Te3 <sup>1</sup>  | W4   | Te3               | 76.6(4)  | W7                | W8   | W7 <sup>1</sup>   | 84.1(3)  |
| Te3 <sup>1</sup>  | W4   | Te15              | 159.3(5) | Te12              | W8   | W7 <sup>1</sup>   | 134.5(2) |
| Te3               | W4   | Te15              | 99.3(2)  | Te12              | W8   | W7                | 134.5(2) |
| Te3               | W4   | Te15 <sup>1</sup> | 159.3(5) | Te12              | W8   | Te11              | 74.1(4)  |
| Te3 <sup>1</sup>  | W4   | Te15 <sup>1</sup> | 99.3(2)  | Te12              | W8   | Te11 <sup>1</sup> | 74.1(4)  |
| Te3               | W4   | Te16 <sup>2</sup> | 87.6(4)  | Te8               | W8   | W7 <sup>1</sup>   | 59.3(3)  |
| Te3 <sup>1</sup>  | W4   | Te16 <sup>2</sup> | 87.6(4)  | Te8               | W8   | W7                | 59.3(3)  |
| Te15 <sup>1</sup> | W4   | Te15              | 77.3(4)  | Te8               | W8   | Te12              | 152.7(6) |
| Te16 <sup>2</sup> | W4   | W3 <sup>1</sup>   | 140.3(2) | Te8               | W8   | Te11 <sup>1</sup> | 84.4(4)  |
| Te16 <sup>2</sup> | W4   | W3                | 140.3(2) | Te8               | W8   | Te11              | 84.4(4)  |

| Atom              | Atom | Atom              | Angle <sup>o</sup> |
|-------------------|------|-------------------|--------------------|
| Te8               | W8   | Te7               | 116.1(4)           |
| Te8               | W8   | Te7 <sup>1</sup>  | 116.1(4)           |
| Te11 <sup>1</sup> | W8   | W7 <sup>1</sup>   | 88.0(2)            |
| Te11              | W8   | W7                | 88.0(2)            |
| Te11 <sup>1</sup> | W8   | W7                | 141.6(4)           |
| Te11              | W8   | W7 <sup>1</sup>   | 141.6(4)           |
| Te11              | W8   | Te11 <sup>1</sup> | 75.3(4)            |
| Te7               | W8   | W7 <sup>1</sup>   | 111.0(4)           |
| Te7               | W8   | W7                | 56.8(3)            |
| Te7 <sup>1</sup>  | W8   | W7                | 111.0(4)           |
| Te7 <sup>1</sup>  | W8   | W7 <sup>1</sup>   | 56.8(3)            |
| Te7 <sup>1</sup>  | W8   | Te12              | 83.1(4)            |
| Te7               | W8   | Te12              | 83.1(4)            |
| Te7               | W8   | Te11              | 95.4(3)            |
| Te7               | W8   | Te11 <sup>1</sup> | 156.9(4)           |
| Te7 <sup>1</sup>  | W8   | Te11 <sup>1</sup> | 95.5(3)            |
| Te7 <sup>1</sup>  | W8   | Te11              | 156.9(4)           |
| Te7               | W8   | Te7 <sup>1</sup>  | 84.9(5)            |
| W5                | W6   | Te9               | 93.9(3)            |
| W5                | W6   | Te11              | 142.8(3)           |
| W7                | W6   | W5                | 73.7(2)            |
| W7                | W6   | Te9               | 140.7(4)           |
| W7                | W6   | Te11              | 91.0(3)            |
| Te10              | W6   | W5                | 138.9(3)           |
| Te10              | W6   | W7                | 138.7(3)           |
| Te10              | W6   | Te9               | 73.5(4)            |
| Te10              | W6   | Te11              | 73.3(3)            |
| Te6               | W6   | W5                | 59.2(3)            |
| Te6               | W6   | W7                | 57.7(2)            |
| Te6               | W6   | Te10              | 150.8(4)           |
| Te6               | W6   | Te9               | 83.7(3)            |
| Te6               | W6   | Te11              | 83.9(3)            |
| Te9               | W6   | Te11              | 76.5(3)            |
| Te5               | W6   | W5                | 58.1(3)            |
| Te5               | W6   | W7                | 104.8(3)           |
| Te5               | W6   | Te10              | 84.8(4)            |
| Te5               | W6   | Te6               | 117.3(4)           |
| Te5               | W6   | Te9               | 99.2(3)            |
| Te5               | W6   | Te11              | 158.1(4)           |
| Te5               | W6   | Te7               | 80.7(3)            |
| Te7               | W6   | W5                | 104.5(3)           |
| Te7               | W6   | W7                | 58.7(3)            |
| Te7               | W6   | Te10              | 84.4(3)            |
| Te7               | W6   | Te6               | 116.3(3)           |
| Te7               | W6   | Te9               | 157.8(4)           |
| Te7               | W6   | Te11              | 95.3(3)            |
| W4                | W3   | Te11              | 138.8(3)           |
| W2                | W3   | W4                | 72.8(2)            |
| W2                | W3   | Te11              | 137.6(3)           |
| Te3               | W3   | W4                | 59.1(3)            |
| Te3               | W3   | W2                | 57.5(2)            |
| Te3               | W3   | Te10              | 86.5(3)            |
| Te3               | W3   | Te11              | 152.9(4)           |
| Te12              | W3   | W4                | 94.4(3)            |
| Te12              | W3   | W2                | 143.5(4)           |
| Te12              | W3   | Te3               | 86.5(4)            |
| Te12              | W3   | Te10              | 80.8(3)            |
| Te12              | W3   | Te11              | 73.5(3)            |
| Te10              | W3   | W4                | 145.6(4)           |
| Te10              | W3   | W2                | 90.9(3)            |
| Te10              | W3   | Te11              | 72.6(3)            |
| Te4               | W3   | W4                | 59.4(4)            |

| Atom              | Atom | Atom              | Angle <sup>o</sup> |
|-------------------|------|-------------------|--------------------|
| Te4               | W3   | W2                | 104.0(4)           |
| Te4               | W3   | Te3               | 118.5(4)           |
| Te4               | W3   | Te12              | 97.6(4)            |
| Te4               | W3   | Te10              | 154.9(5)           |
| Te4               | W3   | Te11              | 82.9(4)            |
| Te4               | W3   | Te2               | 80.3(3)            |
| Te2               | W3   | W4                | 104.7(3)           |
| Te2               | W3   | W2                | 58.4(3)            |
| Te2               | W3   | Te3               | 115.7(4)           |
| Te2               | W3   | Te12              | 156.0(4)           |
| Te2               | W3   | Te10              | 91.1(3)            |
| Te2               | W3   | Te11              | 82.5(3)            |
| W3                | W2   | W1                | 78.5(2)            |
| W3                | W2   | Te14 <sup>2</sup> | 142.4(3)           |
| Te1               | W2   | W3                | 108.9(3)           |
| Te1               | W2   | W1                | 55.4(3)            |
| Te1               | W2   | Te14 <sup>2</sup> | 79.6(3)            |
| Te3               | W2   | W3                | 60.4(3)            |
| Te3               | W2   | W1                | 107.5(3)           |
| Te3               | W2   | Te1               | 83.9(3)            |
| Te3               | W2   | Te13 <sup>2</sup> | 154.7(4)           |
| Te3               | W2   | Te15              | 104.6(3)           |
| Te3               | W2   | Te14 <sup>2</sup> | 85.2(3)            |
| Te3               | W2   | Te2               | 119.7(4)           |
| Te13 <sup>2</sup> | W2   | W3                | 144.7(4)           |
| Te13 <sup>2</sup> | W2   | W1                | 81.7(3)            |
| Te13 <sup>2</sup> | W2   | Te1               | 82.5(3)            |
| Te13 <sup>2</sup> | W2   | Te14 <sup>2</sup> | 71.5(4)            |
| Te15              | W2   | W3                | 93.9(3)            |
| Te15              | W2   | W1                | 137.1(4)           |
| Te15              | W2   | Te1               | 156.8(4)           |
| Te15              | W2   | Te13 <sup>2</sup> | 81.2(3)            |
| Te15              | W2   | Te14 <sup>2</sup> | 79.7(3)            |
| Te14 <sup>2</sup> | W2   | W1                | 130.2(3)           |
| Te2               | W2   | W3                | 59.4(3)            |
| Te2               | W2   | W1                | 56.7(3)            |
| Te2               | W2   | Te1               | 112.0(4)           |
| Te2               | W2   | Te13 <sup>2</sup> | 85.3(4)            |
| Te2               | W2   | Te15              | 82.9(3)            |
| Te2               | W2   | Te14 <sup>2</sup> | 152.7(4)           |
| W6 <sup>3</sup>   | W5   | W6                | 74.6(3)            |
| W6                | W5   | Te14 <sup>3</sup> | 142.4(4)           |
| W6 <sup>3</sup>   | W5   | Te14 <sup>3</sup> | 91.3(2)            |
| W6                | W5   | Te14              | 91.3(2)            |
| W6 <sup>3</sup>   | W5   | Te14              | 142.4(4)           |
| Te13              | W5   | W6 <sup>3</sup>   | 139.1(2)           |
| Te13              | W5   | W6                | 139.1(2)           |
| Te13              | W5   | Te14              | 72.1(4)            |
| Te13              | W5   | Te14 <sup>3</sup> | 72.1(4)            |
| Te13              | W5   | Te6               | 86.1(4)            |
| Te13              | W5   | Te6 <sup>3</sup>  | 86.1(4)            |
| Te14 <sup>3</sup> | W5   | Te14              | 78.8(4)            |
| Te6 <sup>3</sup>  | W5   | W6                | 103.4(4)           |
| Te6               | W5   | W6                | 58.9(3)            |
| Te6 <sup>3</sup>  | W5   | W6 <sup>3</sup>   | 58.9(3)            |
| Te6               | W5   | W6 <sup>3</sup>   | 103.4(4)           |
| Te6 <sup>3</sup>  | W5   | Te14 <sup>3</sup> | 98.2(3)            |
| Te6               | W5   | Te14 <sup>3</sup> | 158.0(5)           |
| Te6 <sup>3</sup>  | W5   | Te14              | 158.0(5)           |
| Te6               | W5   | Te14              | 98.2(3)            |
| Te6               | W5   | Te6 <sup>3</sup>  | 76.4(4)            |
| Te5               | W5   | W6                | 58.4(3)            |

| Atom              | Atom | Atom              | Angle <sup>f</sup> |
|-------------------|------|-------------------|--------------------|
| Te5               | W5   | W6 <sup>3</sup>   | 58.4(3)            |
| Te5               | W5   | Te13              | 149.2(6)           |
| Te5               | W5   | Te14 <sup>3</sup> | 84.3(4)            |
| Te5               | W5   | Te14              | 84.3(4)            |
| Te5               | W5   | Te6 <sup>3</sup>  | 117.3(4)           |
| Te5               | W5   | Te6               | 117.3(4)           |
| W6                | W7   | W8                | 78.5(2)            |
| W6                | W7   | Te15 <sup>4</sup> | 141.0(3)           |
| W6                | W7   | Te8               | 108.2(3)           |
| W6                | W7   | Te16              | 145.6(4)           |
| Te15 <sup>4</sup> | W7   | W8                | 130.0(3)           |
| Te14              | W7   | W8                | 138.3(4)           |
| Te14              | W7   | W6                | 94.7(3)            |
| Te14              | W7   | Te15 <sup>4</sup> | 79.6(3)            |
| Te14              | W7   | Te8               | 156.2(4)           |
| Te14              | W7   | Te16              | 78.9(3)            |
| Te8               | W7   | W8                | 55.9(3)            |
| Te8               | W7   | Te15 <sup>4</sup> | 78.5(3)            |
| Te8               | W7   | Te16              | 85.3(3)            |
| Te6               | W7   | W8                | 108.3(3)           |
| Te6               | W7   | W6                | 60.4(2)            |
| Te6               | W7   | Te15 <sup>4</sup> | 83.2(3)            |
| Te6               | W7   | Te14              | 103.3(3)           |
| Te6               | W7   | Te8               | 83.5(3)            |
| Te6               | W7   | Te16              | 154.0(4)           |
| Te6               | W7   | Te7               | 119.8(3)           |
| Te16              | W7   | W8                | 84.2(3)            |
| Te16              | W7   | Te15 <sup>4</sup> | 71.6(3)            |
| Te7               | W7   | W8                | 57.4(3)            |
| Te7               | W7   | W6                | 59.4(2)            |
| Te7               | W7   | Te15 <sup>4</sup> | 154.3(4)           |
| Te7               | W7   | Te14              | 83.6(3)            |
| Te7               | W7   | Te8               | 113.3(4)           |
| Te7               | W7   | Te16              | 86.2(4)            |
| W2 <sup>3</sup>   | W1   | W2                | 85.4(3)            |
| Te1               | W1   | W2 <sup>3</sup>   | 58.9(3)            |
| Te1               | W1   | W2                | 58.9(3)            |
| Te1               | W1   | Te10              | 88.7(4)            |
| Te1               | W1   | Te10 <sup>3</sup> | 88.7(4)            |
| Te1               | W1   | Te9               | 154.8(6)           |
| Te1               | W1   | Te2 <sup>3</sup>  | 115.2(4)           |
| Te1               | W1   | Te2               | 115.2(4)           |
| Te10              | W1   | W2 <sup>3</sup>   | 145.4(4)           |
| Te10              | W1   | W2                | 87.6(2)            |
| Te10 <sup>3</sup> | W1   | W2                | 145.4(4)           |
| Te10 <sup>3</sup> | W1   | W2 <sup>3</sup>   | 87.6(2)            |
| Te10 <sup>3</sup> | W1   | Te10              | 79.3(4)            |
| Te10 <sup>3</sup> | W1   | Te9               | 72.1(3)            |
| Te10              | W1   | Te9               | 72.1(3)            |
| Te9               | W1   | W2                | 133.6(2)           |
| Te9               | W1   | W2 <sup>3</sup>   | 133.6(2)           |
| Te2 <sup>3</sup>  | W1   | W2 <sup>3</sup>   | 56.4(3)            |
| Te2               | W1   | W2 <sup>3</sup>   | 111.9(4)           |
| Te2               | W1   | W2                | 56.4(3)            |
| Te2 <sup>3</sup>  | W1   | W2                | 111.9(4)           |
| Te2 <sup>3</sup>  | W1   | Te10 <sup>3</sup> | 91.8(3)            |
| Te2               | W1   | Te10 <sup>3</sup> | 154.5(5)           |
| Te2               | W1   | Te10              | 91.8(3)            |
| Te2 <sup>3</sup>  | W1   | Te10              | 154.5(5)           |
| Te2               | W1   | Te9               | 82.4(4)            |
| Te2 <sup>3</sup>  | W1   | Te9               | 82.4(4)            |
| Te2               | W1   | Te2 <sup>3</sup>  | 86.1(5)            |

| Atom            | Atom | Atom            | Angle <sup>f</sup> |
|-----------------|------|-----------------|--------------------|
| W2              | Te1  | W2 <sup>3</sup> | 92.4(4)            |
| W1              | Te1  | W2              | 65.7(3)            |
| W1              | Te1  | W2 <sup>3</sup> | 65.7(3)            |
| W4              | Te3  | W3              | 61.4(3)            |
| W2              | Te3  | W4              | 75.9(3)            |
| W2              | Te3  | W3              | 62.1(3)            |
| W2 <sup>4</sup> | Te13 | W2 <sup>5</sup> | 92.9(4)            |
| W5              | Te13 | W2 <sup>5</sup> | 111.1(4)           |
| W5              | Te13 | W2 <sup>4</sup> | 111.1(4)           |
| Br7             | Te13 | W2 <sup>5</sup> | 113.5(5)           |
| Br7             | Te13 | W2 <sup>4</sup> | 113.5(5)           |
| Br7             | Te13 | W5              | 113.2(7)           |
| W8              | Te12 | W3              | 110.7(5)           |
| W8              | Te12 | W3 <sup>1</sup> | 110.7(5)           |
| W3              | Te12 | W3 <sup>1</sup> | 75.9(4)            |
| Br5             | Te12 | W8              | 116.4(7)           |
| Br5             | Te12 | W3 <sup>1</sup> | 118.3(5)           |
| Br5             | Te12 | W3              | 118.3(5)           |
| W4              | Te15 | W7 <sup>2</sup> | 106.0(4)           |
| W2              | Te15 | W4              | 73.0(3)            |
| W2              | Te15 | W7 <sup>2</sup> | 101.1(3)           |
| W5              | Te14 | W2 <sup>4</sup> | 104.1(4)           |
| W7              | Te14 | W2 <sup>4</sup> | 99.5(3)            |
| W7              | Te14 | W5              | 73.3(3)            |
| W6              | Te10 | W3              | 110.9(3)           |
| W6              | Te10 | W1              | 111.1(4)           |
| W1              | Te10 | W3              | 82.5(3)            |
| Br4             | Te10 | W6              | 118.0(6)           |
| Br4             | Te10 | W3              | 113.8(5)           |
| Br4             | Te10 | W1              | 115.3(5)           |
| W8              | Te8  | W7 <sup>1</sup> | 64.7(3)            |
| W8              | Te8  | W7              | 64.7(3)            |
| W7 <sup>1</sup> | Te8  | W7              | 89.5(4)            |
| W6              | Te6  | W5              | 62.0(3)            |
| W7              | Te6  | W6              | 62.0(2)            |
| W7              | Te6  | W5              | 76.9(3)            |
| W4 <sup>4</sup> | Te16 | W7 <sup>1</sup> | 109.7(4)           |
| W4 <sup>4</sup> | Te16 | W7              | 109.7(4)           |
| W7              | Te16 | W7 <sup>1</sup> | 89.5(5)            |
| Br6             | Te16 | W4 <sup>4</sup> | 115.8(7)           |
| Br6             | Te16 | W7              | 114.6(5)           |
| Br6             | Te16 | W7 <sup>1</sup> | 114.6(5)           |
| W6              | Te9  | W6 <sup>3</sup> | 73.5(4)            |
| W6              | Te9  | W1              | 102.9(4)           |
| W6 <sup>3</sup> | Te9  | W1              | 102.9(4)           |
| W8              | Te11 | W3              | 101.6(3)           |
| W6              | Te11 | W8              | 77.4(3)            |
| W6              | Te11 | W3              | 102.8(3)           |
| W6 <sup>3</sup> | Te5  | W6              | 79.0(5)            |
| W5              | Te5  | W6 <sup>3</sup> | 63.4(4)            |
| W5              | Te5  | W6              | 63.4(4)            |
| W8              | Te7  | W6              | 83.6(3)            |
| W7              | Te7  | W8              | 65.8(3)            |
| W7              | Te7  | W6              | 61.9(3)            |
| W3              | Te4  | W4              | 62.1(3)            |
| W3 <sup>1</sup> | Te4  | W4              | 62.1(3)            |
| W3 <sup>1</sup> | Te4  | W3              | 77.3(5)            |
| W2              | Te2  | W3              | 62.2(3)            |
| W2              | Te2  | W1              | 66.9(3)            |
| W1              | Te2  | W3              | 84.7(4)            |

<sup>1</sup>1-x,+y,+z; <sup>2</sup>2+x,+y,-1+z; <sup>3</sup>3-x,+y,+z; <sup>4</sup>4+x,+y,1+z; <sup>5</sup>5-x,+y,1+z
